# Supplementary material for: Prediction of Drug Combinations by Integrating Molecular and Pharmacological Data
Source: PLoS Comput Biol. 2011 Dec 29;7(12):e1002323. doi: 10.1371/journal.pcbi.1002323 (PMC3248384; doi:10.1371/journal.pcbi.1002323)
Supplement: Dataset S2 — The drug-therapy network in Cytoscape format. In the network, the edge property of ‘dd’ denotes drug-drug associations that are approved combinations and ‘da’ drug-therapy (represented as ATC code) associations. (TSV) [file pcbi.1002323.s003.tsv]

metformin hydrochloride	dd	rosiglitazone maleate
acetaminophen	dd	pentazocine hydrochloride
bisoprolol fumarate	dd	hydrochlorothiazide
diphenhydramine citrate	dd	ibuprofen
ciprofloxacin	dd	hydrocortisone
metformin hydrochloride	dd	saxagliptin
glipizide	dd	metformin hydrochloride
ethinyl estradiol	dd	norelgestromin
diphenhydramine hydrochloride	dd	ibuprofen
epinephrine	dd	lidocaine hydrochloride
ibuprofen	dd	pseudoephedrine hydrochloride
atropine sulfate	dd	diphenoxylate hydrochloride
ibuprofen	dd	phenylephrine hydrochloride
bendroflumethiazide	dd	nadolol
dextrose	dd	sodium chloride
fosinopril	dd	hydrochlorothiazide
eprosartan mesylate	dd	hydrochlorothiazide
ethinyl estradiol	dd	levonorgestrel
niacin	dd	simvastatin
aspirin	dd	carisoprodol
atropine sulfate	dd	difenoxin hydrochloride
amitriptyline hydrochloride	dd	perphenazine
amiloride hydrochloride	dd	hydrochlorothiazide
benazepril hydrochloride	dd	hydrochlorothiazide
lovastatin	dd	niacin
hydrochlorothiazide	dd	triamterene
hydrochlorothiazide	dd	lisinopril
hydrochlorothiazide	dd	moexipril hydrochloride
estradiol	dd	norgestimate
ethinyl estradiol	dd	norethindrone
dextrose	dd	potassium chloride
metformin hydrochloride	dd	sitagliptin phosphate
metformin hydrochloride	dd	repaglinide
acetaminophen	dd	propoxyphene hydrochloride
acetaminophen	dd	tramadol hydrochloride
hydrochlorothiazide	dd	olmesartan medoxomil
hydrochlorothiazide	dd	irbesartan
ciprofloxacin	dd	dexamethasone
ethinyl estradiol	dd	ethynodiol diacetate
hydrochlorothiazide	dd	spironolactone
ethinyl estradiol	dd	norgestimate
aspirin	dd	methocarbamol
enalapril maleate	dd	hydrochlorothiazide
ethinyl estradiol	dd	etonogestrel
hydrochlorothiazide	dd	telmisartan
glimepiride	dd	rosiglitazone maleate
estradiol	dd	levonorgestrel
desogestrel	dd	ethinyl estradiol
glyburide	dd	metformin hydrochloride
hydrochlorothiazide	dd	propranolol hydrochloride
hydrochlorothiazide	dd	quinapril hydrochloride
captopril	dd	hydrochlorothiazide
fluoxetine hydrochloride	dd	olanzapine
hydrochlorothiazide	dd	valsartan
hydrochlorothiazide	dd	losartan potassium
fosinopril	da	C09A	1
saxagliptin	da	A10B	1
lovastatin	da	C10A	1
moexipril hydrochloride	da	C09A	1
hydrochlorothiazide	da	C03A	1
hydrochlorothiazide	da	C03A	1
hydrochlorothiazide	da	C03A	1
hydrochlorothiazide	da	C03A	1
hydrochlorothiazide	da	C03A	1
hydrochlorothiazide	da	C03A	1
hydrochlorothiazide	da	C03A	1
hydrochlorothiazide	da	C03A	1
hydrochlorothiazide	da	C03A	1
hydrochlorothiazide	da	C03A	1
hydrochlorothiazide	da	C03A	1
hydrochlorothiazide	da	C03A	1
hydrochlorothiazide	da	C03A	1
hydrochlorothiazide	da	C03A	1
hydrochlorothiazide	da	C03A	1
hydrochlorothiazide	da	C03A	1
hydrochlorothiazide	da	C03A	1
hydrochlorothiazide	da	C03A	1
glipizide	da	A10B	1
hydrocortisone	da	D07X	1
hydrocortisone	da	H02A	1
hydrocortisone	da	S01C	1
hydrocortisone	da	S02B	1
simvastatin	da	C10A	1
repaglinide	da	A10B	1
dexamethasone	da	D07X	1
dexamethasone	da	H02A	1
dexamethasone	da	S01C	1
dexamethasone	da	S02B	1
dexamethasone	da	D07X	1
dexamethasone	da	H02A	1
dexamethasone	da	S01C	1
dexamethasone	da	S02B	1
pentazocine hydrochloride	da	N02A	1
methocarbamol	da	M03B	1
sodium chloride	da	B05X	1
ibuprofen	da	C01E	1
ibuprofen	da	C01E	1
ibuprofen	da	C01E	1
ibuprofen	da	C01E	1
amiloride hydrochloride	da	C03D	1
benazepril hydrochloride	da	C09A	1
diphenoxylate hydrochloride	da	A07D	1
diphenoxylate hydrochloride	da	A07D	1
tramadol hydrochloride	da	N02A	1
phenylephrine hydrochloride	da	R01B	1
glimepiride	da	A10B	1
perphenazine	da	N05A	1
acetaminophen	da	N02B	1
acetaminophen	da	N02B	1
acetaminophen	da	N02B	1
propoxyphene hydrochloride	da	N02A	1
nadolol	da	C07A	1
telmisartan	da	C09C	1
rosiglitazone maleate	da	A10B	1
rosiglitazone maleate	da	A10B	1
norethindrone	da	G03A	1
norethindrone	da	G03A	1
dextrose	da	V06D	1
dextrose	da	V06D	1
triamterene	da	C03D	1
difenoxin hydrochloride	da	A07D	1
difenoxin hydrochloride	da	A07D	1
enalapril maleate	da	C09A	1
niacin	da	C04A	1
niacin	da	C04A	1
levonorgestrel	da	G02B	1
levonorgestrel	da	G02B	1
levonorgestrel	da	G02B	1
levonorgestrel	da	G02B	1
levonorgestrel	da	G02B	1
levonorgestrel	da	G02B	1
levonorgestrel	da	G02B	1
levonorgestrel	da	G02B	1
levonorgestrel	da	G02B	1
levonorgestrel	da	G02B	1
levonorgestrel	da	G02B	1
levonorgestrel	da	G02B	1
diphenhydramine citrate	da	N04A	1
norgestimate	da	G03A	1
norgestimate	da	G03A	1
norgestimate	da	G03A	1
norgestimate	da	G03A	1
norgestimate	da	G03A	1
norgestimate	da	G03A	1
ethynodiol diacetate	da	G03D	1
ethynodiol diacetate	da	G03D	1
glyburide	da	A10B	1
quinapril hydrochloride	da	C09A	1
lidocaine hydrochloride	da	N01B	1
etonogestrel	da	G03A	1
etonogestrel	da	G03A	1
lisinopril	da	C09A	1
atropine sulfate	da	A03B	1
atropine sulfate	da	A03B	1
atropine sulfate	da	A03B	1
atropine sulfate	da	A03B	1
ciprofloxacin	da	J01M	1
ciprofloxacin	da	J01M	1
ciprofloxacin	da	J01M	1
ciprofloxacin	da	J01M	1
ciprofloxacin	da	J01M	1
ciprofloxacin	da	J01M	1
ciprofloxacin	da	J01M	1
ciprofloxacin	da	J01M	1
ciprofloxacin	da	J01M	1
ciprofloxacin	da	J01M	1
ciprofloxacin	da	J01M	1
ciprofloxacin	da	J01M	1
metformin hydrochloride	da	A10B	1
metformin hydrochloride	da	A10B	1
metformin hydrochloride	da	A10B	1
metformin hydrochloride	da	A10B	1
metformin hydrochloride	da	A10B	1
metformin hydrochloride	da	A10B	1
aspirin	da	B01A	1
aspirin	da	B01A	1
norelgestromin	da	G03A	1
norelgestromin	da	G03A	1
pseudoephedrine hydrochloride	da	R01B	1
ethinyl estradiol	da	G03C	1
ethinyl estradiol	da	L02A	1
ethinyl estradiol	da	G03C	1
ethinyl estradiol	da	L02A	1
ethinyl estradiol	da	G03C	1
ethinyl estradiol	da	G03C	1
ethinyl estradiol	da	L02A	1
ethinyl estradiol	da	L02A	1
ethinyl estradiol	da	G03C	1
ethinyl estradiol	da	L02A	1
ethinyl estradiol	da	G03C	1
ethinyl estradiol	da	L02A	1
ethinyl estradiol	da	G03C	1
ethinyl estradiol	da	L02A	1
ethinyl estradiol	da	G03C	1
ethinyl estradiol	da	L02A	1
captopril	da	C09A	1
olmesartan medoxomil	da	C09C	1
bisoprolol fumarate	da	C07A	1
sitagliptin phosphate	da	A10B	1
spironolactone	da	C03D	1
potassium chloride	da	B05X	1
losartan potassium	da	C09C	1
eprosartan mesylate	da	C09C	1
valsartan	da	C09C	1
propranolol hydrochloride	da	C07A	1
amitriptyline hydrochloride	da	N06A	1
irbesartan	da	C09C	1
bendroflumethiazide	da	C03A	1
carisoprodol	da	M03B	1
fluoxetine hydrochloride	da	N06A	1
desogestrel	da	G03A	1
desogestrel	da	G03A	1
olanzapine	da	N05A	1
estradiol	da	G03C	1
estradiol	da	G03C	1
estradiol	da	G03C	1
estradiol	da	G03C	1
estradiol	da	L02A	1
estradiol	da	L02A	1
estradiol	da	L02A	1
estradiol	da	L02A	1
estradiol	da	G03C	1
estradiol	da	G03C	1
estradiol	da	L02A	1
estradiol	da	L02A	1
epinephrine	da	B02B	1
diphenhydramine hydrochloride	da	N04A	1
