# Supplementary material for: Prediction of Drug Combinations by Integrating Molecular and Pharmacological Data
Source: PLoS Comput Biol. 2011 Dec 29;7(12):e1002323. doi: 10.1371/journal.pcbi.1002323 (PMC3248384; doi:10.1371/journal.pcbi.1002323)
Supplement: Table S2 — Protein pairs with corresponding scores based on all known drug combinations. (XLSX) [file pcbi.1002323.s005.xlsx]

## Sheet: full_target_snr.tsv
Target pair	Score
ENSP00000303960_ENSP00000341044	1
ENSP00000300061_ENSP00000366654	1
ENSP00000360973_ENSP00000366654	1
ENSP00000353292_ENSP00000229264	1
ENSP00000303960_ENSP00000275525	1
ENSP00000280097_ENSP00000293761	1
ENSP00000280097_ENSP00000369510	1
ENSP00000280097_ENSP00000251535	1
ENSP00000300061_ENSP00000309649	1
ENSP00000353292_ENSP00000309649	1
ENSP00000368393_ENSP00000229264	1
ENSP00000353292_ENSP00000366654	1
ENSP00000303960_ENSP00000229328	1
ENSP00000368393_ENSP00000309649	1
ENSP00000300061_ENSP00000229264	1
ENSP00000273430_ENSP00000309649	1
ENSP00000302874_ENSP00000309649	1
ENSP00000280097_ENSP00000371517	1
ENSP00000280097_ENSP00000284981	1
ENSP00000360973_ENSP00000229264	1
ENSP00000302874_ENSP00000366654	1
ENSP00000360973_ENSP00000309649	1
ENSP00000319713_ENSP00000229264	1
ENSP00000303960_ENSP00000360290	1
ENSP00000273430_ENSP00000229264	1
ENSP00000319713_ENSP00000366654	1
ENSP00000368393_ENSP00000366654	1
ENSP00000280097_ENSP00000316970	1
ENSP00000273430_ENSP00000366654	1
ENSP00000303960_ENSP00000344789	1
ENSP00000319713_ENSP00000309649	1
ENSP00000302874_ENSP00000229264	1
ENSP00000252519_ENSP00000229264	0.75
ENSP00000229328_ENSP00000264867	0.75
ENSP00000252519_ENSP00000366654	0.75
ENSP00000316136_ENSP00000229328	0.75
ENSP00000316136_ENSP00000360290	0.75
ENSP00000369713_ENSP00000309649	0.75
ENSP00000316136_ENSP00000275525	0.75
ENSP00000316136_ENSP00000341044	0.75
ENSP00000369713_ENSP00000366654	0.75
ENSP00000252519_ENSP00000309649	0.75
ENSP00000344789_ENSP00000264867	0.75
ENSP00000369713_ENSP00000229264	0.75
ENSP00000275525_ENSP00000264867	0.75
ENSP00000316136_ENSP00000344789	0.75
ENSP00000341044_ENSP00000264867	0.75
ENSP00000360290_ENSP00000264867	0.75
ENSP00000370163_ENSP00000278207	0.666667
ENSP00000360290_ENSP00000371556	0.666667
ENSP00000341044_ENSP00000312649	0.666667
ENSP00000370163_ENSP00000356223	0.666667
ENSP00000357068_ENSP00000341044	0.666667
ENSP00000370163_ENSP00000262999	0.666667
ENSP00000357178_ENSP00000229328	0.666667
ENSP00000357178_ENSP00000341044	0.666667
ENSP00000354222_ENSP00000328742	0.666667
ENSP00000344789_ENSP00000371556	0.666667
ENSP00000354222_ENSP00000219771	0.666667
ENSP00000357178_ENSP00000275525	0.666667
ENSP00000357068_ENSP00000229328	0.666667
ENSP00000370163_ENSP00000308165	0.666667
ENSP00000275525_ENSP00000371556	0.666667
ENSP00000354222_ENSP00000276844	0.666667
ENSP00000342560_ENSP00000316970	0.666667
ENSP00000357068_ENSP00000360290	0.666667
ENSP00000342560_ENSP00000251535	0.666667
ENSP00000370163_ENSP00000312029	0.666667
ENSP00000357178_ENSP00000344789	0.666667
ENSP00000342560_ENSP00000284981	0.666667
ENSP00000370163_ENSP00000278222	0.666667
ENSP00000275525_ENSP00000312649	0.666667
ENSP00000360290_ENSP00000312649	0.666667
ENSP00000357178_ENSP00000360290	0.666667
ENSP00000354222_ENSP00000299964	0.666667
ENSP00000370163_ENSP00000222553	0.666667
ENSP00000342560_ENSP00000369510	0.666667
ENSP00000229328_ENSP00000371556	0.666667
ENSP00000354222_ENSP00000296202	0.666667
ENSP00000342560_ENSP00000293761	0.666667
ENSP00000357068_ENSP00000344789	0.666667
ENSP00000341044_ENSP00000371556	0.666667
ENSP00000370163_ENSP00000256733	0.666667
ENSP00000344789_ENSP00000312649	0.666667
ENSP00000229328_ENSP00000312649	0.666667
ENSP00000342560_ENSP00000371517	0.666667
ENSP00000354222_ENSP00000375066	0.666667
ENSP00000357068_ENSP00000275525	0.666667
ENSP00000272190_ENSP00000366654	0.6
ENSP00000272190_ENSP00000229264	0.6
ENSP00000272190_ENSP00000309649	0.6
ENSP00000290866_ENSP00000229264	0.571429
ENSP00000290866_ENSP00000366654	0.571429
ENSP00000290866_ENSP00000309649	0.571429
ENSP00000325120_ENSP00000359380	0.538462
ENSP00000325120_ENSP00000356537	0.538462
ENSP00000325120_ENSP00000294954	0.538462
ENSP00000325120_ENSP00000324248	0.538462
ENSP00000325120_ENSP00000215539	0.538462
ENSP00000325120_ENSP00000322229	0.538462
ENSP00000325120_ENSP00000280357	0.538462
ENSP00000325120_ENSP00000324270	0.538462
ENSP00000325120_ENSP00000226413	0.538462
ENSP00000325120_ENSP00000323889	0.538462
ENSP00000325120_ENSP00000265643	0.538462
ENSP00000325120_ENSP00000343877	0.538462
ENSP00000325120_ENSP00000308938	0.538462
ENSP00000325120_ENSP00000264613	0.538462
ENSP00000325120_ENSP00000330341	0.538462
ENSP00000325120_ENSP00000318867	0.538462
ENSP00000325120_ENSP00000306780	0.538462
ENSP00000325120_ENSP00000299022	0.538462
ENSP00000325120_ENSP00000344936	0.538462
ENSP00000325120_ENSP00000355906	0.538462
ENSP00000325120_ENSP00000373468	0.538462
ENSP00000325120_ENSP00000227666	0.538462
ENSP00000325120_ENSP00000343155	0.538462
ENSP00000325120_ENSP00000053867	0.538462
ENSP00000273430_ENSP00000262502	0.5
ENSP00000358107_ENSP00000300061	0.5
ENSP00000343925_ENSP00000053867	0.5
ENSP00000343925_ENSP00000373468	0.5
ENSP00000280097_ENSP00000362508	0.5
ENSP00000275525_ENSP00000353731	0.5
ENSP00000341044_ENSP00000353731	0.5
ENSP00000360973_ENSP00000367608	0.5
ENSP00000229328_ENSP00000353731	0.5
ENSP00000343925_ENSP00000227666	0.5
ENSP00000269593_ENSP00000372002	0.5
ENSP00000360973_ENSP00000345659	0.5
ENSP00000343925_ENSP00000308938	0.5
ENSP00000257497_ENSP00000269577	0.5
ENSP00000358107_ENSP00000353292	0.5
ENSP00000280097_ENSP00000172229	0.5
ENSP00000000442_ENSP00000372002	0.5
ENSP00000343925_ENSP00000323889	0.5
ENSP00000350815_ENSP00000000442	0.5
ENSP00000343925_ENSP00000318867	0.5
ENSP00000302874_ENSP00000369679	0.5
ENSP00000328150_ENSP00000358903	0.5
ENSP00000343925_ENSP00000324248	0.5
ENSP00000368438_ENSP00000372002	0.5
ENSP00000343925_ENSP00000264613	0.5
ENSP00000344789_ENSP00000353731	0.5
ENSP00000280097_ENSP00000327082	0.5
ENSP00000300061_ENSP00000367608	0.5
ENSP00000287936_ENSP00000219771	0.5
ENSP00000360973_ENSP00000369679	0.5
ENSP00000363822_ENSP00000269593	0.5
ENSP00000361308_ENSP00000269577	0.5
ENSP00000358107_ENSP00000368393	0.5
ENSP00000343925_ENSP00000330341	0.5
ENSP00000343925_ENSP00000265643	0.5
ENSP00000363822_ENSP00000226877	0.5
ENSP00000319713_ENSP00000369679	0.5
ENSP00000345708_ENSP00000360290	0.5
ENSP00000273430_ENSP00000345659	0.5
ENSP00000343925_ENSP00000355906	0.5
ENSP00000343925_ENSP00000226413	0.5
ENSP00000287936_ENSP00000276844	0.5
ENSP00000357068_ENSP00000358903	0.5
ENSP00000287936_ENSP00000328742	0.5
ENSP00000319713_ENSP00000345659	0.5
ENSP00000303960_ENSP00000358903	0.5
ENSP00000353292_ENSP00000367608	0.5
ENSP00000363822_ENSP00000370270	0.5
ENSP00000273430_ENSP00000367608	0.5
ENSP00000350815_ENSP00000355904	0.5
ENSP00000343925_ENSP00000299022	0.5
ENSP00000368438_ENSP00000274192	0.5
ENSP00000343925_ENSP00000344936	0.5
ENSP00000343925_ENSP00000322229	0.5
ENSP00000316786_ENSP00000269577	0.5
ENSP00000295598_ENSP00000229264	0.5
ENSP00000252444_ENSP00000296202	0.5
ENSP00000303960_ENSP00000246515	0.5
ENSP00000343925_ENSP00000215539	0.5
ENSP00000252444_ENSP00000219771	0.5
ENSP00000353827_ENSP00000269577	0.5
ENSP00000280097_ENSP00000280892	0.5
ENSP00000280097_ENSP00000221891	0.5
ENSP00000300061_ENSP00000345659	0.5
ENSP00000353292_ENSP00000345659	0.5
ENSP00000287936_ENSP00000375066	0.5
ENSP00000252444_ENSP00000299964	0.5
ENSP00000262502_ENSP00000353292	0.5
ENSP00000343925_ENSP00000280357	0.5
ENSP00000363822_ENSP00000226444	0.5
ENSP00000300061_ENSP00000369679	0.5
ENSP00000303960_ENSP00000251595	0.5
ENSP00000295598_ENSP00000366654	0.5
ENSP00000360290_ENSP00000353731	0.5
ENSP00000363822_ENSP00000355904	0.5
ENSP00000343925_ENSP00000343877	0.5
ENSP00000355627_ENSP00000366654	0.5
ENSP00000265447_ENSP00000269577	0.5
ENSP00000368393_ENSP00000367608	0.5
ENSP00000252444_ENSP00000276844	0.5
ENSP00000252444_ENSP00000375066	0.5
ENSP00000343925_ENSP00000343155	0.5
ENSP00000273430_ENSP00000369679	0.5
ENSP00000359424_ENSP00000280097	0.5
ENSP00000345708_ENSP00000229328	0.5
ENSP00000343925_ENSP00000359380	0.5
ENSP00000345708_ENSP00000344789	0.5
ENSP00000363822_ENSP00000000442	0.5
ENSP00000350815_ENSP00000368438	0.5
ENSP00000303830_ENSP00000341044	0.5
ENSP00000302874_ENSP00000367608	0.5
ENSP00000219070_ENSP00000366654	0.5
ENSP00000303830_ENSP00000275525	0.5
ENSP00000262502_ENSP00000302874	0.5
ENSP00000303830_ENSP00000344789	0.5
ENSP00000341479_ENSP00000358903	0.5
ENSP00000303830_ENSP00000360290	0.5
ENSP00000350815_ENSP00000226877	0.5
ENSP00000361305_ENSP00000269577	0.5
ENSP00000350815_ENSP00000370270	0.5
ENSP00000350815_ENSP00000226444	0.5
ENSP00000262219_ENSP00000269577	0.5
ENSP00000368393_ENSP00000369679	0.5
ENSP00000269593_ENSP00000274192	0.5
ENSP00000226444_ENSP00000372002	0.5
ENSP00000287936_ENSP00000296202	0.5
ENSP00000262502_ENSP00000360973	0.5
ENSP00000370270_ENSP00000372002	0.5
ENSP00000252444_ENSP00000328742	0.5
ENSP00000353292_ENSP00000369679	0.5
ENSP00000331698_ENSP00000358903	0.5
ENSP00000343925_ENSP00000306780	0.5
ENSP00000348234_ENSP00000269577	0.5
ENSP00000355904_ENSP00000274192	0.5
ENSP00000345708_ENSP00000341044	0.5
ENSP00000219070_ENSP00000309649	0.5
ENSP00000363822_ENSP00000368438	0.5
ENSP00000303830_ENSP00000229328	0.5
ENSP00000302874_ENSP00000345659	0.5
ENSP00000343925_ENSP00000324270	0.5
ENSP00000226877_ENSP00000274192	0.5
ENSP00000287936_ENSP00000299964	0.5
ENSP00000368393_ENSP00000345659	0.5
ENSP00000295598_ENSP00000309649	0.5
ENSP00000319713_ENSP00000367608	0.5
ENSP00000352248_ENSP00000269577	0.5
ENSP00000262502_ENSP00000368393	0.5
ENSP00000319713_ENSP00000262502	0.5
ENSP00000345708_ENSP00000275525	0.5
ENSP00000000442_ENSP00000274192	0.5
ENSP00000343925_ENSP00000294954	0.5
ENSP00000319713_ENSP00000358107	0.5
ENSP00000355627_ENSP00000309649	0.5
ENSP00000343925_ENSP00000356537	0.5
ENSP00000355904_ENSP00000372002	0.5
ENSP00000358107_ENSP00000360973	0.5
ENSP00000303960_ENSP00000355920	0.5
ENSP00000355627_ENSP00000229264	0.5
ENSP00000262502_ENSP00000300061	0.5
ENSP00000303960_ENSP00000260116	0.5
ENSP00000273430_ENSP00000358107	0.5
ENSP00000316136_ENSP00000358903	0.5
ENSP00000226877_ENSP00000372002	0.5
ENSP00000280097_ENSP00000259206	0.5
ENSP00000226444_ENSP00000274192	0.5
ENSP00000219070_ENSP00000229264	0.5
ENSP00000358107_ENSP00000302874	0.5
ENSP00000370270_ENSP00000274192	0.5
ENSP00000350815_ENSP00000269593	0.5
ENSP00000265572_ENSP00000229416	0.444444
ENSP00000265572_ENSP00000305651	0.444444
ENSP00000265572_ENSP00000335544	0.444444
ENSP00000265572_ENSP00000359539	0.444444
ENSP00000265572_ENSP00000245206	0.444444
ENSP00000265572_ENSP00000354279	0.444444
ENSP00000265572_ENSP00000216951	0.444444
ENSP00000206249_ENSP00000264613	0.428571
ENSP00000206249_ENSP00000355906	0.428571
ENSP00000206249_ENSP00000227666	0.428571
ENSP00000206249_ENSP00000343877	0.428571
ENSP00000206249_ENSP00000226413	0.428571
ENSP00000206249_ENSP00000280357	0.428571
ENSP00000206249_ENSP00000265643	0.428571
ENSP00000206249_ENSP00000330341	0.428571
ENSP00000206249_ENSP00000308938	0.428571
ENSP00000206249_ENSP00000359380	0.428571
ENSP00000206249_ENSP00000344936	0.428571
ENSP00000206249_ENSP00000356537	0.428571
ENSP00000206249_ENSP00000373468	0.428571
ENSP00000206249_ENSP00000215539	0.428571
ENSP00000206249_ENSP00000322229	0.428571
ENSP00000206249_ENSP00000294954	0.428571
ENSP00000206249_ENSP00000053867	0.428571
ENSP00000206249_ENSP00000299022	0.428571
ENSP00000206249_ENSP00000318867	0.428571
ENSP00000206249_ENSP00000323889	0.428571
ENSP00000206249_ENSP00000306780	0.428571
ENSP00000206249_ENSP00000324248	0.428571
ENSP00000206249_ENSP00000343155	0.428571
ENSP00000206249_ENSP00000324270	0.428571
ENSP00000252519_ENSP00000369679	0.416667
ENSP00000252519_ENSP00000345659	0.416667
ENSP00000252519_ENSP00000367608	0.416667
ENSP00000325120_ENSP00000370270	0.4
ENSP00000325120_ENSP00000000442	0.4
ENSP00000325120_ENSP00000226877	0.4
ENSP00000343925_ENSP00000226444	0.4
ENSP00000343925_ENSP00000269593	0.4
ENSP00000346625_ENSP00000251535	0.4
ENSP00000343925_ENSP00000368438	0.4
ENSP00000343925_ENSP00000355904	0.4
ENSP00000343925_ENSP00000370270	0.4
ENSP00000357178_ENSP00000358903	0.4
ENSP00000343925_ENSP00000000442	0.4
ENSP00000325120_ENSP00000368438	0.4
ENSP00000325120_ENSP00000226444	0.4
ENSP00000343925_ENSP00000226877	0.4
ENSP00000325120_ENSP00000269593	0.4
ENSP00000325120_ENSP00000355904	0.4
ENSP00000346625_ENSP00000371517	0.4
ENSP00000346625_ENSP00000316970	0.4
ENSP00000346625_ENSP00000369510	0.4
ENSP00000346625_ENSP00000293761	0.4
ENSP00000346625_ENSP00000284981	0.4
ENSP00000358903_ENSP00000264867	0.375
ENSP00000369713_ENSP00000345659	0.375
ENSP00000252519_ENSP00000358107	0.375
ENSP00000358107_ENSP00000369713	0.375
ENSP00000316136_ENSP00000260116	0.375
ENSP00000287820_ENSP00000275525	0.375
ENSP00000287820_ENSP00000341044	0.375
ENSP00000355920_ENSP00000264867	0.375
ENSP00000246515_ENSP00000264867	0.375
ENSP00000252519_ENSP00000262502	0.375
ENSP00000287820_ENSP00000360290	0.375
ENSP00000316136_ENSP00000355920	0.375
ENSP00000316136_ENSP00000246515	0.375
ENSP00000369713_ENSP00000367608	0.375
ENSP00000287820_ENSP00000344789	0.375
ENSP00000251595_ENSP00000264867	0.375
ENSP00000345708_ENSP00000358903	0.375
ENSP00000260116_ENSP00000264867	0.375
ENSP00000262502_ENSP00000369713	0.375
ENSP00000287820_ENSP00000229328	0.375
ENSP00000316136_ENSP00000251595	0.375
ENSP00000369713_ENSP00000369679	0.375
ENSP00000229768_ENSP00000229416	0.363636
ENSP00000229768_ENSP00000245206	0.363636
ENSP00000229768_ENSP00000359539	0.363636
ENSP00000229768_ENSP00000335544	0.363636
ENSP00000229768_ENSP00000305651	0.363636
ENSP00000229768_ENSP00000216951	0.363636
ENSP00000229768_ENSP00000354279	0.363636
ENSP00000272190_ENSP00000369679	0.35
ENSP00000272190_ENSP00000345659	0.35
ENSP00000272190_ENSP00000367608	0.35
ENSP00000342560_ENSP00000327082	0.333333
ENSP00000280097_ENSP00000362505	0.333333
ENSP00000357178_ENSP00000370163	0.333333
ENSP00000318912_ENSP00000360973	0.333333
ENSP00000303960_ENSP00000355930	0.333333
ENSP00000328150_ENSP00000357178	0.333333
ENSP00000357178_ENSP00000251595	0.333333
ENSP00000357178_ENSP00000246515	0.333333
ENSP00000366109_ENSP00000269577	0.333333
ENSP00000357068_ENSP00000221515	0.333333
ENSP00000318912_ENSP00000302874	0.333333
ENSP00000350766_ENSP00000368393	0.333333
ENSP00000364469_ENSP00000276844	0.333333
ENSP00000280097_ENSP00000305221	0.333333
ENSP00000225831_ENSP00000366654	0.333333
ENSP00000252486_ENSP00000219771	0.333333
ENSP00000280097_ENSP00000362534	0.333333
ENSP00000252486_ENSP00000276844	0.333333
ENSP00000311032_ENSP00000375066	0.333333
ENSP00000311032_ENSP00000219771	0.333333
ENSP00000246515_ENSP00000371556	0.333333
ENSP00000300900_ENSP00000360973	0.333333
ENSP00000206249_ENSP00000355904	0.333333
ENSP00000280097_ENSP00000355930	0.333333
ENSP00000350815_ENSP00000329623	0.333333
ENSP00000260116_ENSP00000371556	0.333333
ENSP00000366903_ENSP00000318912	0.333333
ENSP00000337127_ENSP00000372002	0.333333
ENSP00000370163_ENSP00000348918	0.333333
ENSP00000264381_ENSP00000176195	0.333333
ENSP00000370163_ENSP00000309124	0.333333
ENSP00000350766_ENSP00000350815	0.333333
ENSP00000342560_ENSP00000280892	0.333333
ENSP00000350766_ENSP00000363822	0.333333
ENSP00000350766_ENSP00000300061	0.333333
ENSP00000252486_ENSP00000299964	0.333333
ENSP00000252486_ENSP00000296202	0.333333
ENSP00000256906_ENSP00000316970	0.333333
ENSP00000359424_ENSP00000342560	0.333333
ENSP00000251595_ENSP00000371556	0.333333
ENSP00000357068_ENSP00000246515	0.333333
ENSP00000280097_ENSP00000362549	0.333333
ENSP00000342560_ENSP00000259206	0.333333
ENSP00000303960_ENSP00000370163	0.333333
ENSP00000370163_ENSP00000264867	0.333333
ENSP00000280097_ENSP00000318585	0.333333
ENSP00000370163_ENSP00000353916	0.333333
ENSP00000329623_ENSP00000372002	0.333333
ENSP00000280097_ENSP00000346768	0.333333
ENSP00000252486_ENSP00000328742	0.333333
ENSP00000357068_ENSP00000260116	0.333333
ENSP00000256906_ENSP00000371517	0.333333
ENSP00000319713_ENSP00000350766	0.333333
ENSP00000225831_ENSP00000229264	0.333333
ENSP00000256906_ENSP00000293761	0.333333
ENSP00000300900_ENSP00000302874	0.333333
ENSP00000364469_ENSP00000296202	0.333333
ENSP00000273430_ENSP00000318912	0.333333
ENSP00000311032_ENSP00000299964	0.333333
ENSP00000357068_ENSP00000251595	0.333333
ENSP00000370163_ENSP00000364494	0.333333
ENSP00000252486_ENSP00000375066	0.333333
ENSP00000350766_ENSP00000360973	0.333333
ENSP00000370163_ENSP00000365016	0.333333
ENSP00000280097_ENSP00000260433	0.333333
ENSP00000357068_ENSP00000357178	0.333333
ENSP00000342560_ENSP00000172229	0.333333
ENSP00000355920_ENSP00000371556	0.333333
ENSP00000354222_ENSP00000354532	0.333333
ENSP00000328150_ENSP00000312652	0.333333
ENSP00000370163_ENSP00000319814	0.333333
ENSP00000364469_ENSP00000219771	0.333333
ENSP00000355920_ENSP00000312649	0.333333
ENSP00000303960_ENSP00000220809	0.333333
ENSP00000373298_ENSP00000357461	0.333333
ENSP00000370163_ENSP00000358424	0.333333
ENSP00000246515_ENSP00000312649	0.333333
ENSP00000300900_ENSP00000300061	0.333333
ENSP00000358903_ENSP00000312649	0.333333
ENSP00000373298_ENSP00000367391	0.333333
ENSP00000260433_ENSP00000274192	0.333333
ENSP00000318912_ENSP00000353292	0.333333
ENSP00000342560_ENSP00000362508	0.333333
ENSP00000316136_ENSP00000221515	0.333333
ENSP00000357178_ENSP00000260116	0.333333
ENSP00000303960_ENSP00000357178	0.333333
ENSP00000328150_ENSP00000221515	0.333333
ENSP00000303960_ENSP00000312652	0.333333
ENSP00000364469_ENSP00000299964	0.333333
ENSP00000358903_ENSP00000370163	0.333333
ENSP00000206249_ENSP00000368438	0.333333
ENSP00000331698_ENSP00000357178	0.333333
ENSP00000311032_ENSP00000328742	0.333333
ENSP00000260116_ENSP00000312649	0.333333
ENSP00000318912_ENSP00000300061	0.333333
ENSP00000319713_ENSP00000300900	0.333333
ENSP00000342560_ENSP00000221891	0.333333
ENSP00000357097_ENSP00000261733	0.333333
ENSP00000363822_ENSP00000329623	0.333333
ENSP00000350815_ENSP00000337127	0.333333
ENSP00000273430_ENSP00000300900	0.333333
ENSP00000256906_ENSP00000251535	0.333333
ENSP00000337127_ENSP00000274192	0.333333
ENSP00000206249_ENSP00000269593	0.333333
ENSP00000350766_ENSP00000353292	0.333333
ENSP00000331698_ENSP00000312652	0.333333
ENSP00000221515_ENSP00000319814	0.333333
ENSP00000357178_ENSP00000357178	0.333333
ENSP00000300900_ENSP00000368393	0.333333
ENSP00000329623_ENSP00000274192	0.333333
ENSP00000221515_ENSP00000256104	0.333333
ENSP00000260433_ENSP00000372002	0.333333
ENSP00000370163_ENSP00000268712	0.333333
ENSP00000357068_ENSP00000312652	0.333333
ENSP00000316136_ENSP00000357178	0.333333
ENSP00000318912_ENSP00000368393	0.333333
ENSP00000341479_ENSP00000357178	0.333333
ENSP00000303960_ENSP00000221515	0.333333
ENSP00000357178_ENSP00000355920	0.333333
ENSP00000370163_ENSP00000320940	0.333333
ENSP00000364469_ENSP00000328742	0.333333
ENSP00000251595_ENSP00000312649	0.333333
ENSP00000363822_ENSP00000337127	0.333333
ENSP00000206249_ENSP00000226444	0.333333
ENSP00000358903_ENSP00000371556	0.333333
ENSP00000280097_ENSP00000304845	0.333333
ENSP00000316136_ENSP00000312652	0.333333
ENSP00000273430_ENSP00000350766	0.333333
ENSP00000373298_ENSP00000225992	0.333333
ENSP00000370163_ENSP00000256104	0.333333
ENSP00000260433_ENSP00000363822	0.333333
ENSP00000260433_ENSP00000350815	0.333333
ENSP00000350766_ENSP00000302874	0.333333
ENSP00000341479_ENSP00000312652	0.333333
ENSP00000357068_ENSP00000355920	0.333333
ENSP00000206249_ENSP00000000442	0.333333
ENSP00000319713_ENSP00000318912	0.333333
ENSP00000256906_ENSP00000284981	0.333333
ENSP00000264381_ENSP00000225992	0.333333
ENSP00000225831_ENSP00000309649	0.333333
ENSP00000364469_ENSP00000375066	0.333333
ENSP00000373298_ENSP00000176195	0.333333
ENSP00000264381_ENSP00000357461	0.333333
ENSP00000331698_ENSP00000221515	0.333333
ENSP00000256906_ENSP00000369510	0.333333
ENSP00000311032_ENSP00000296202	0.333333
ENSP00000280097_ENSP00000252809	0.333333
ENSP00000300900_ENSP00000353292	0.333333
ENSP00000264381_ENSP00000367391	0.333333
ENSP00000341479_ENSP00000221515	0.333333
ENSP00000206249_ENSP00000226877	0.333333
ENSP00000311032_ENSP00000276844	0.333333
ENSP00000206249_ENSP00000370270	0.333333
ENSP00000290866_ENSP00000369679	0.321429
ENSP00000290866_ENSP00000345659	0.321429
ENSP00000290866_ENSP00000367608	0.321429
ENSP00000272190_ENSP00000358107	0.307692
ENSP00000272190_ENSP00000262502	0.307692
ENSP00000234961_ENSP00000354279	0.3
ENSP00000234961_ENSP00000305651	0.3
ENSP00000234961_ENSP00000245206	0.3
ENSP00000234961_ENSP00000335544	0.3
ENSP00000234961_ENSP00000229416	0.3
ENSP00000234961_ENSP00000216951	0.3
ENSP00000234961_ENSP00000359539	0.3
ENSP00000347754_ENSP00000354279	0.285714
ENSP00000347754_ENSP00000229416	0.285714
ENSP00000303830_ENSP00000251595	0.285714
ENSP00000250080_ENSP00000356537	0.285714
ENSP00000347754_ENSP00000305651	0.285714
ENSP00000250080_ENSP00000227666	0.285714
ENSP00000250080_ENSP00000344936	0.285714
ENSP00000340684_ENSP00000371517	0.285714
ENSP00000250080_ENSP00000215539	0.285714
ENSP00000250080_ENSP00000318867	0.285714
ENSP00000303830_ENSP00000358903	0.285714
ENSP00000250080_ENSP00000343877	0.285714
ENSP00000347754_ENSP00000245206	0.285714
ENSP00000340684_ENSP00000316970	0.285714
ENSP00000250080_ENSP00000265643	0.285714
ENSP00000340684_ENSP00000369510	0.285714
ENSP00000340684_ENSP00000284981	0.285714
ENSP00000250080_ENSP00000359380	0.285714
ENSP00000250080_ENSP00000324270	0.285714
ENSP00000250080_ENSP00000280357	0.285714
ENSP00000250080_ENSP00000324248	0.285714
ENSP00000290866_ENSP00000358107	0.285714
ENSP00000250080_ENSP00000306780	0.285714
ENSP00000250080_ENSP00000322229	0.285714
ENSP00000347754_ENSP00000359539	0.285714
ENSP00000250080_ENSP00000355906	0.285714
ENSP00000250080_ENSP00000323889	0.285714
ENSP00000250080_ENSP00000294954	0.285714
ENSP00000250080_ENSP00000264613	0.285714
ENSP00000250080_ENSP00000053867	0.285714
ENSP00000250080_ENSP00000308938	0.285714
ENSP00000340684_ENSP00000251535	0.285714
ENSP00000250080_ENSP00000343155	0.285714
ENSP00000250080_ENSP00000226413	0.285714
ENSP00000347754_ENSP00000335544	0.285714
ENSP00000250080_ENSP00000373468	0.285714
ENSP00000290866_ENSP00000262502	0.285714
ENSP00000250080_ENSP00000299022	0.285714
ENSP00000347754_ENSP00000216951	0.285714
ENSP00000340684_ENSP00000293761	0.285714
ENSP00000250080_ENSP00000330341	0.285714
ENSP00000325120_ENSP00000356969	0.28
ENSP00000325120_ENSP00000330021	0.28
ENSP00000325120_ENSP00000276449	0.28
ENSP00000252519_ENSP00000300900	0.277778
ENSP00000303830_ENSP00000370163	0.272727
ENSP00000325120_ENSP00000282561	0.269231
ENSP00000325120_ENSP00000361965	0.269231
ENSP00000325120_ENSP00000365980	0.269231
ENSP00000325120_ENSP00000258149	0.269231
ENSP00000325120_ENSP00000320940	0.269231
ENSP00000325120_ENSP00000221130	0.269231
ENSP00000325120_ENSP00000333769	0.269231
ENSP00000343925_ENSP00000330021	0.266667
ENSP00000343925_ENSP00000356969	0.266667
ENSP00000325120_ENSP00000329623	0.263158
ENSP00000325120_ENSP00000337127	0.263158
ENSP00000325120_ENSP00000260433	0.263158
ENSP00000343925_ENSP00000260433	0.26087
ENSP00000343925_ENSP00000337127	0.26087
ENSP00000343925_ENSP00000329623	0.26087
ENSP00000347441_ENSP00000370270	0.25
ENSP00000350815_ENSP00000370783	0.25
ENSP00000219070_ENSP00000367608	0.25
ENSP00000370783_ENSP00000372002	0.25
ENSP00000231449_ENSP00000265447	0.25
ENSP00000343925_ENSP00000334276	0.25
ENSP00000219070_ENSP00000345659	0.25
ENSP00000355627_ENSP00000358107	0.25
ENSP00000343925_ENSP00000372558	0.25
ENSP00000343925_ENSP00000370253	0.25
ENSP00000324820_ENSP00000269577	0.25
ENSP00000347441_ENSP00000368438	0.25
ENSP00000343925_ENSP00000341045	0.25
ENSP00000343925_ENSP00000371790	0.25
ENSP00000343925_ENSP00000348888	0.25
ENSP00000343925_ENSP00000228606	0.25
ENSP00000343925_ENSP00000304507	0.25
ENSP00000312652_ENSP00000264867	0.25
ENSP00000303830_ENSP00000260116	0.25
ENSP00000343925_ENSP00000365980	0.25
ENSP00000343925_ENSP00000199936	0.25
ENSP00000233809_ENSP00000363822	0.25
ENSP00000343925_ENSP00000260630	0.25
ENSP00000231449_ENSP00000353827	0.25
ENSP00000263611_ENSP00000369679	0.25
ENSP00000373995_ENSP00000274192	0.25
ENSP00000345708_ENSP00000355920	0.25
ENSP00000343925_ENSP00000260227	0.25
ENSP00000345708_ENSP00000246515	0.25
ENSP00000316136_ENSP00000355930	0.25
ENSP00000331108_ENSP00000316970	0.25
ENSP00000304895_ENSP00000328150	0.25
ENSP00000304895_ENSP00000341479	0.25
ENSP00000231449_ENSP00000348234	0.25
ENSP00000216117_ENSP00000274192	0.25
ENSP00000343925_ENSP00000308770	0.25
ENSP00000363822_ENSP00000370783	0.25
ENSP00000343925_ENSP00000261597	0.25
ENSP00000178638_ENSP00000360973	0.25
ENSP00000319713_ENSP00000256119	0.25
ENSP00000347441_ENSP00000000442	0.25
ENSP00000350766_ENSP00000369713	0.25
ENSP00000355627_ENSP00000369679	0.25
ENSP00000256958_ENSP00000219771	0.25
ENSP00000216117_ENSP00000372002	0.25
ENSP00000343925_ENSP00000371767	0.25
ENSP00000273430_ENSP00000256119	0.25
ENSP00000216117_ENSP00000350815	0.25
ENSP00000256119_ENSP00000302874	0.25
ENSP00000178638_ENSP00000353292	0.25
ENSP00000358903_ENSP00000353731	0.25
ENSP00000370783_ENSP00000274192	0.25
ENSP00000357259_ENSP00000350815	0.25
ENSP00000331698_ENSP00000303830	0.25
ENSP00000341479_ENSP00000303830	0.25
ENSP00000355627_ENSP00000345659	0.25
ENSP00000178638_ENSP00000302874	0.25
ENSP00000233809_ENSP00000350815	0.25
ENSP00000328150_ENSP00000303830	0.25
ENSP00000280097_ENSP00000363512	0.25
ENSP00000343925_ENSP00000258149	0.25
ENSP00000343925_ENSP00000278353	0.25
ENSP00000347441_ENSP00000333769	0.25
ENSP00000303830_ENSP00000246515	0.25
ENSP00000345708_ENSP00000260116	0.25
ENSP00000345708_ENSP00000312652	0.25
ENSP00000220809_ENSP00000264867	0.25
ENSP00000358107_ENSP00000219070	0.25
ENSP00000343925_ENSP00000252542	0.25
ENSP00000319713_ENSP00000178638	0.25
ENSP00000343925_ENSP00000286604	0.25
ENSP00000316136_ENSP00000303830	0.25
ENSP00000373995_ENSP00000350815	0.25
ENSP00000343925_ENSP00000280612	0.25
ENSP00000343925_ENSP00000254521	0.25
ENSP00000263611_ENSP00000367608	0.25
ENSP00000343925_ENSP00000222330	0.25
ENSP00000347441_ENSP00000355904	0.25
ENSP00000345708_ENSP00000251595	0.25
ENSP00000304895_ENSP00000331698	0.25
ENSP00000331108_ENSP00000293761	0.25
ENSP00000357068_ENSP00000303830	0.25
ENSP00000343925_ENSP00000292123	0.25
ENSP00000355627_ENSP00000367608	0.25
ENSP00000343205_ENSP00000269577	0.25
ENSP00000267163_ENSP00000363822	0.25
ENSP00000216117_ENSP00000363822	0.25
ENSP00000262502_ENSP00000219070	0.25
ENSP00000318912_ENSP00000369713	0.25
ENSP00000366903_ENSP00000178638	0.25
ENSP00000343925_ENSP00000333769	0.25
ENSP00000345708_ENSP00000221515	0.25
ENSP00000343925_ENSP00000291567	0.25
ENSP00000343925_ENSP00000363777	0.25
ENSP00000251595_ENSP00000353731	0.25
ENSP00000343925_ENSP00000310721	0.25
ENSP00000267163_ENSP00000372002	0.25
ENSP00000343925_ENSP00000290277	0.25
ENSP00000343925_ENSP00000276414	0.25
ENSP00000357259_ENSP00000274192	0.25
ENSP00000276449_ENSP00000343925	0.25
ENSP00000331108_ENSP00000369510	0.25
ENSP00000316136_ENSP00000370163	0.25
ENSP00000304895_ENSP00000316136	0.25
ENSP00000219070_ENSP00000369679	0.25
ENSP00000256119_ENSP00000360973	0.25
ENSP00000357178_ENSP00000221515	0.25
ENSP00000343925_ENSP00000364412	0.25
ENSP00000260116_ENSP00000353731	0.25
ENSP00000347441_ENSP00000337127	0.25
ENSP00000256958_ENSP00000296202	0.25
ENSP00000343925_ENSP00000277668	0.25
ENSP00000256958_ENSP00000276844	0.25
ENSP00000256119_ENSP00000300061	0.25
ENSP00000357259_ENSP00000363822	0.25
ENSP00000231449_ENSP00000257497	0.25
ENSP00000256958_ENSP00000328742	0.25
ENSP00000343925_ENSP00000320940	0.25
ENSP00000347441_ENSP00000226444	0.25
ENSP00000231449_ENSP00000352248	0.25
ENSP00000343925_ENSP00000221130	0.25
ENSP00000295598_ENSP00000262502	0.25
ENSP00000231449_ENSP00000316786	0.25
ENSP00000343925_ENSP00000353917	0.25
ENSP00000252444_ENSP00000354532	0.25
ENSP00000345708_ENSP00000357178	0.25
ENSP00000331108_ENSP00000251535	0.25
ENSP00000252519_ENSP00000350766	0.25
ENSP00000343925_ENSP00000256216	0.25
ENSP00000355627_ENSP00000262502	0.25
ENSP00000233809_ENSP00000372002	0.25
ENSP00000343925_ENSP00000264657	0.25
ENSP00000357259_ENSP00000372002	0.25
ENSP00000256119_ENSP00000368393	0.25
ENSP00000343925_ENSP00000301061	0.25
ENSP00000343925_ENSP00000282356	0.25
ENSP00000347441_ENSP00000226877	0.25
ENSP00000316136_ENSP00000220809	0.25
ENSP00000256958_ENSP00000299964	0.25
ENSP00000267163_ENSP00000350815	0.25
ENSP00000343925_ENSP00000237612	0.25
ENSP00000178638_ENSP00000368393	0.25
ENSP00000231449_ENSP00000262219	0.25
ENSP00000343925_ENSP00000265403	0.25
ENSP00000303830_ENSP00000355920	0.25
ENSP00000343925_ENSP00000221421	0.25
ENSP00000343925_ENSP00000370074	0.25
ENSP00000343925_ENSP00000230236	0.25
ENSP00000343925_ENSP00000354587	0.25
ENSP00000355930_ENSP00000264867	0.25
ENSP00000355920_ENSP00000353731	0.25
ENSP00000331108_ENSP00000371517	0.25
ENSP00000343925_ENSP00000302486	0.25
ENSP00000267163_ENSP00000274192	0.25
ENSP00000231449_ENSP00000361308	0.25
ENSP00000231449_ENSP00000361305	0.25
ENSP00000273430_ENSP00000178638	0.25
ENSP00000369683_ENSP00000261707	0.25
ENSP00000300900_ENSP00000369713	0.25
ENSP00000343925_ENSP00000361965	0.25
ENSP00000357178_ENSP00000264867	0.25
ENSP00000343925_ENSP00000297450	0.25
ENSP00000347441_ENSP00000269577	0.25
ENSP00000343925_ENSP00000339587	0.25
ENSP00000263611_ENSP00000345659	0.25
ENSP00000280097_ENSP00000228740	0.25
ENSP00000295598_ENSP00000367608	0.25
ENSP00000343925_ENSP00000254122	0.25
ENSP00000252519_ENSP00000318912	0.25
ENSP00000233809_ENSP00000274192	0.25
ENSP00000343925_ENSP00000370473	0.25
ENSP00000343925_ENSP00000225928	0.25
ENSP00000246515_ENSP00000353731	0.25
ENSP00000295598_ENSP00000369679	0.25
ENSP00000343925_ENSP00000282561	0.25
ENSP00000357178_ENSP00000312652	0.25
ENSP00000331108_ENSP00000284981	0.25
ENSP00000343925_ENSP00000354976	0.25
ENSP00000304895_ENSP00000303960	0.25
ENSP00000343925_ENSP00000369757	0.25
ENSP00000256958_ENSP00000375066	0.25
ENSP00000343925_ENSP00000251566	0.25
ENSP00000295598_ENSP00000345659	0.25
ENSP00000343925_ENSP00000225577	0.25
ENSP00000256119_ENSP00000369713	0.25
ENSP00000347441_ENSP00000269593	0.25
ENSP00000343925_ENSP00000302961	0.25
ENSP00000343925_ENSP00000222002	0.25
ENSP00000256119_ENSP00000353292	0.25
ENSP00000221515_ENSP00000264867	0.25
ENSP00000373995_ENSP00000363822	0.25
ENSP00000343925_ENSP00000265441	0.25
ENSP00000343925_ENSP00000242057	0.25
ENSP00000373995_ENSP00000372002	0.25
ENSP00000304895_ENSP00000357068	0.25
ENSP00000295598_ENSP00000358107	0.25
ENSP00000178638_ENSP00000300061	0.25
ENSP00000343925_ENSP00000267843	0.25
ENSP00000303830_ENSP00000303960	0.25
ENSP00000287936_ENSP00000354532	0.25
ENSP00000272190_ENSP00000300900	0.237288
ENSP00000325120_ENSP00000370253	0.230769
ENSP00000325120_ENSP00000370473	0.230769
ENSP00000325120_ENSP00000228606	0.230769
ENSP00000325120_ENSP00000302961	0.230769
ENSP00000325120_ENSP00000278353	0.230769
ENSP00000325120_ENSP00000297450	0.230769
ENSP00000325120_ENSP00000265441	0.230769
ENSP00000325120_ENSP00000354587	0.230769
ENSP00000325120_ENSP00000242057	0.230769
ENSP00000325120_ENSP00000264657	0.230769
ENSP00000325120_ENSP00000265403	0.230769
ENSP00000325120_ENSP00000370074	0.230769
ENSP00000325120_ENSP00000286604	0.230769
ENSP00000325120_ENSP00000301061	0.230769
ENSP00000325120_ENSP00000280612	0.230769
ENSP00000325120_ENSP00000199936	0.230769
ENSP00000325120_ENSP00000225928	0.230769
ENSP00000325120_ENSP00000369757	0.230769
ENSP00000325120_ENSP00000353917	0.230769
ENSP00000325120_ENSP00000290277	0.230769
ENSP00000325120_ENSP00000348888	0.230769
ENSP00000325120_ENSP00000260630	0.230769
ENSP00000325120_ENSP00000237612	0.230769
ENSP00000325120_ENSP00000354976	0.230769
ENSP00000325120_ENSP00000276414	0.230769
ENSP00000325120_ENSP00000310721	0.230769
ENSP00000325120_ENSP00000230236	0.230769
ENSP00000250080_ENSP00000370270	0.230769
ENSP00000250080_ENSP00000226444	0.230769
ENSP00000325120_ENSP00000222330	0.230769
ENSP00000325120_ENSP00000291567	0.230769
ENSP00000325120_ENSP00000254521	0.230769
ENSP00000325120_ENSP00000252542	0.230769
ENSP00000325120_ENSP00000282356	0.230769
ENSP00000325120_ENSP00000222002	0.230769
ENSP00000250080_ENSP00000368438	0.230769
ENSP00000325120_ENSP00000334276	0.230769
ENSP00000325120_ENSP00000261597	0.230769
ENSP00000325120_ENSP00000302486	0.230769
ENSP00000325120_ENSP00000292123	0.230769
ENSP00000250080_ENSP00000269593	0.230769
ENSP00000325120_ENSP00000304507	0.230769
ENSP00000325120_ENSP00000371767	0.230769
ENSP00000250080_ENSP00000355904	0.230769
ENSP00000325120_ENSP00000221421	0.230769
ENSP00000325120_ENSP00000254122	0.230769
ENSP00000325120_ENSP00000341045	0.230769
ENSP00000325120_ENSP00000372558	0.230769
ENSP00000206249_ENSP00000329623	0.230769
ENSP00000325120_ENSP00000251566	0.230769
ENSP00000325120_ENSP00000371790	0.230769
ENSP00000325120_ENSP00000308770	0.230769
ENSP00000325120_ENSP00000364412	0.230769
ENSP00000250080_ENSP00000000442	0.230769
ENSP00000325120_ENSP00000225577	0.230769
ENSP00000206249_ENSP00000337127	0.230769
ENSP00000325120_ENSP00000339587	0.230769
ENSP00000325120_ENSP00000277668	0.230769
ENSP00000325120_ENSP00000260227	0.230769
ENSP00000325120_ENSP00000256216	0.230769
ENSP00000325120_ENSP00000267843	0.230769
ENSP00000250080_ENSP00000226877	0.230769
ENSP00000252519_ENSP00000256119	0.229167
ENSP00000361099_ENSP00000318867	0.222222
ENSP00000333203_ENSP00000261733	0.222222
ENSP00000361099_ENSP00000324270	0.222222
ENSP00000361099_ENSP00000227666	0.222222
ENSP00000361099_ENSP00000308938	0.222222
ENSP00000361099_ENSP00000373468	0.222222
ENSP00000223095_ENSP00000309649	0.222222
ENSP00000312652_ENSP00000312649	0.222222
ENSP00000361099_ENSP00000299022	0.222222
ENSP00000361099_ENSP00000324248	0.222222
ENSP00000355930_ENSP00000312649	0.222222
ENSP00000223095_ENSP00000256733	0.222222
ENSP00000357178_ENSP00000312649	0.222222
ENSP00000223095_ENSP00000222553	0.222222
ENSP00000223095_ENSP00000229264	0.222222
ENSP00000223095_ENSP00000366654	0.222222
ENSP00000361099_ENSP00000226413	0.222222
ENSP00000361099_ENSP00000306780	0.222222
ENSP00000358301_ENSP00000300900	0.222222
ENSP00000248419_ENSP00000355930	0.222222
ENSP00000342560_ENSP00000362549	0.222222
ENSP00000361099_ENSP00000355906	0.222222
ENSP00000361099_ENSP00000343877	0.222222
ENSP00000206249_ENSP00000356969	0.222222
ENSP00000361099_ENSP00000322229	0.222222
ENSP00000355627_ENSP00000318912	0.222222
ENSP00000223095_ENSP00000262999	0.222222
ENSP00000361099_ENSP00000264613	0.222222
ENSP00000223095_ENSP00000312029	0.222222
ENSP00000342560_ENSP00000362534	0.222222
ENSP00000342560_ENSP00000260433	0.222222
ENSP00000303830_ENSP00000357178	0.222222
ENSP00000370163_ENSP00000348749	0.222222
ENSP00000370163_ENSP00000371556	0.222222
ENSP00000355930_ENSP00000371556	0.222222
ENSP00000312652_ENSP00000371556	0.222222
ENSP00000265572_ENSP00000221130	0.222222
ENSP00000223095_ENSP00000356223	0.222222
ENSP00000361099_ENSP00000359380	0.222222
ENSP00000265572_ENSP00000346586	0.222222
ENSP00000357178_ENSP00000220809	0.222222
ENSP00000312652_ENSP00000370163	0.222222
ENSP00000357178_ENSP00000371556	0.222222
ENSP00000206249_ENSP00000333769	0.222222
ENSP00000361099_ENSP00000053867	0.222222
ENSP00000342560_ENSP00000304845	0.222222
ENSP00000342560_ENSP00000362505	0.222222
ENSP00000223095_ENSP00000308165	0.222222
ENSP00000361099_ENSP00000294954	0.222222
ENSP00000370163_ENSP00000312649	0.222222
ENSP00000220809_ENSP00000371556	0.222222
ENSP00000357068_ENSP00000220809	0.222222
ENSP00000361099_ENSP00000344936	0.222222
ENSP00000370163_ENSP00000216780	0.222222
ENSP00000220809_ENSP00000312649	0.222222
ENSP00000361099_ENSP00000215539	0.222222
ENSP00000265572_ENSP00000339221	0.222222
ENSP00000361099_ENSP00000280357	0.222222
ENSP00000223095_ENSP00000278207	0.222222
ENSP00000342560_ENSP00000252809	0.222222
ENSP00000361099_ENSP00000265643	0.222222
ENSP00000342560_ENSP00000318585	0.222222
ENSP00000370163_ENSP00000365290	0.222222
ENSP00000370163_ENSP00000278070	0.222222
ENSP00000357178_ENSP00000355930	0.222222
ENSP00000361099_ENSP00000356537	0.222222
ENSP00000221515_ENSP00000370163	0.222222
ENSP00000361099_ENSP00000343155	0.222222
ENSP00000206249_ENSP00000282561	0.222222
ENSP00000342560_ENSP00000305221	0.222222
ENSP00000221515_ENSP00000312649	0.222222
ENSP00000265572_ENSP00000244137	0.222222
ENSP00000221515_ENSP00000371556	0.222222
ENSP00000357068_ENSP00000370163	0.222222
ENSP00000206249_ENSP00000330021	0.222222
ENSP00000342560_ENSP00000346768	0.222222
ENSP00000265572_ENSP00000343645	0.222222
ENSP00000342560_ENSP00000355930	0.222222
ENSP00000357068_ENSP00000355930	0.222222
ENSP00000361099_ENSP00000330341	0.222222
ENSP00000361099_ENSP00000323889	0.222222
ENSP00000223095_ENSP00000278222	0.222222
ENSP00000206249_ENSP00000260433	0.219512
ENSP00000206249_ENSP00000221421	0.214286
ENSP00000206249_ENSP00000334276	0.214286
ENSP00000206249_ENSP00000260630	0.214286
ENSP00000206249_ENSP00000222330	0.214286
ENSP00000206249_ENSP00000261597	0.214286
ENSP00000206249_ENSP00000267843	0.214286
ENSP00000206249_ENSP00000225577	0.214286
ENSP00000250080_ENSP00000333769	0.214286
ENSP00000206249_ENSP00000301061	0.214286
ENSP00000206249_ENSP00000370253	0.214286
ENSP00000206249_ENSP00000369757	0.214286
ENSP00000206249_ENSP00000276414	0.214286
ENSP00000206249_ENSP00000364412	0.214286
ENSP00000206249_ENSP00000258149	0.214286
ENSP00000206249_ENSP00000370473	0.214286
ENSP00000206249_ENSP00000370074	0.214286
ENSP00000206249_ENSP00000348888	0.214286
ENSP00000206249_ENSP00000302961	0.214286
ENSP00000206249_ENSP00000371790	0.214286
ENSP00000206249_ENSP00000264657	0.214286
ENSP00000206249_ENSP00000286604	0.214286
ENSP00000206249_ENSP00000361965	0.214286
ENSP00000206249_ENSP00000230236	0.214286
ENSP00000250080_ENSP00000356969	0.214286
ENSP00000206249_ENSP00000260227	0.214286
ENSP00000206249_ENSP00000353917	0.214286
ENSP00000206249_ENSP00000225928	0.214286
ENSP00000206249_ENSP00000252542	0.214286
ENSP00000206249_ENSP00000221130	0.214286
ENSP00000290866_ENSP00000300900	0.214286
ENSP00000206249_ENSP00000292123	0.214286
ENSP00000206249_ENSP00000371767	0.214286
ENSP00000206249_ENSP00000341045	0.214286
ENSP00000206249_ENSP00000310721	0.214286
ENSP00000206249_ENSP00000320940	0.214286
ENSP00000206249_ENSP00000354976	0.214286
ENSP00000206249_ENSP00000277668	0.214286
ENSP00000206249_ENSP00000280612	0.214286
ENSP00000206249_ENSP00000265441	0.214286
ENSP00000206249_ENSP00000308770	0.214286
ENSP00000206249_ENSP00000237612	0.214286
ENSP00000206249_ENSP00000242057	0.214286
ENSP00000276449_ENSP00000206249	0.214286
ENSP00000206249_ENSP00000265403	0.214286
ENSP00000206249_ENSP00000256216	0.214286
ENSP00000206249_ENSP00000278353	0.214286
ENSP00000206249_ENSP00000354587	0.214286
ENSP00000206249_ENSP00000290277	0.214286
ENSP00000206249_ENSP00000251566	0.214286
ENSP00000206249_ENSP00000254122	0.214286
ENSP00000206249_ENSP00000339587	0.214286
ENSP00000206249_ENSP00000297450	0.214286
ENSP00000250080_ENSP00000330021	0.214286
ENSP00000206249_ENSP00000199936	0.214286
ENSP00000206249_ENSP00000291567	0.214286
ENSP00000206249_ENSP00000372558	0.214286
ENSP00000206249_ENSP00000365980	0.214286
ENSP00000206249_ENSP00000228606	0.214286
ENSP00000206249_ENSP00000302486	0.214286
ENSP00000206249_ENSP00000222002	0.214286
ENSP00000206249_ENSP00000304507	0.214286
ENSP00000206249_ENSP00000254521	0.214286
ENSP00000206249_ENSP00000282356	0.214286
ENSP00000252519_ENSP00000178638	0.208333
ENSP00000325120_ENSP00000233809	0.204082
ENSP00000272190_ENSP00000318912	0.20339
ENSP00000272190_ENSP00000350766	0.20339
ENSP00000327251_ENSP00000310149	0.2
ENSP00000327251_ENSP00000269577	0.2
ENSP00000229135_ENSP00000257497	0.2
ENSP00000346625_ENSP00000259206	0.2
ENSP00000229135_ENSP00000280097	0.2
ENSP00000280097_ENSP00000279178	0.2
ENSP00000346625_ENSP00000327082	0.2
ENSP00000356066_ENSP00000367608	0.2
ENSP00000302665_ENSP00000350815	0.2
ENSP00000356066_ENSP00000345659	0.2
ENSP00000229135_ENSP00000262219	0.2
ENSP00000374454_ENSP00000369947	0.2
ENSP00000356066_ENSP00000369679	0.2
ENSP00000359424_ENSP00000346625	0.2
ENSP00000269582_ENSP00000374454	0.2
ENSP00000374454_ENSP00000303500	0.2
ENSP00000280097_ENSP00000367309	0.2
ENSP00000327251_ENSP00000265512	0.2
ENSP00000229135_ENSP00000361308	0.2
ENSP00000229135_ENSP00000361305	0.2
ENSP00000229135_ENSP00000353827	0.2
ENSP00000327251_ENSP00000209665	0.2
ENSP00000215832_ENSP00000350815	0.2
ENSP00000350815_ENSP00000338742	0.2
ENSP00000361848_ENSP00000358424	0.2
ENSP00000338742_ENSP00000372002	0.2
ENSP00000215832_ENSP00000363822	0.2
ENSP00000363748_ENSP00000345659	0.2
ENSP00000229135_ENSP00000316786	0.2
ENSP00000303830_ENSP00000303830	0.2
ENSP00000215832_ENSP00000372002	0.2
ENSP00000302665_ENSP00000274192	0.2
ENSP00000303960_ENSP00000361848	0.2
ENSP00000250080_ENSP00000337127	0.2
ENSP00000338742_ENSP00000274192	0.2
ENSP00000311508_ENSP00000303960	0.2
ENSP00000327251_ENSP00000280097	0.2
ENSP00000374454_ENSP00000276393	0.2
ENSP00000327251_ENSP00000294342	0.2
ENSP00000355527_ENSP00000251535	0.2
ENSP00000228872_ENSP00000350815	0.2
ENSP00000346625_ENSP00000362508	0.2
ENSP00000228872_ENSP00000363822	0.2
ENSP00000215832_ENSP00000274192	0.2
ENSP00000355527_ENSP00000293761	0.2
ENSP00000229135_ENSP00000348234	0.2
ENSP00000346625_ENSP00000221891	0.2
ENSP00000229135_ENSP00000265447	0.2
ENSP00000302665_ENSP00000372002	0.2
ENSP00000355527_ENSP00000284981	0.2
ENSP00000302665_ENSP00000363822	0.2
ENSP00000363748_ENSP00000367608	0.2
ENSP00000228872_ENSP00000274192	0.2
ENSP00000228872_ENSP00000372002	0.2
ENSP00000355527_ENSP00000369510	0.2
ENSP00000355527_ENSP00000316970	0.2
ENSP00000229135_ENSP00000352248	0.2
ENSP00000302665_ENSP00000364731	0.2
ENSP00000280097_ENSP00000237014	0.2
ENSP00000363822_ENSP00000338742	0.2
ENSP00000363748_ENSP00000369679	0.2
ENSP00000238349_ENSP00000238349	0.2
ENSP00000346625_ENSP00000280892	0.2
ENSP00000346625_ENSP00000172229	0.2
ENSP00000355527_ENSP00000371517	0.2
ENSP00000325120_ENSP00000357259	0.196078
ENSP00000216117_ENSP00000325120	0.196078
ENSP00000325120_ENSP00000267163	0.196078
ENSP00000325120_ENSP00000373995	0.196078
ENSP00000325120_ENSP00000370783	0.196078
ENSP00000290866_ENSP00000318912	0.195122
ENSP00000272190_ENSP00000256119	0.194805
ENSP00000343925_ENSP00000267163	0.193548
ENSP00000343925_ENSP00000370783	0.193548
ENSP00000343925_ENSP00000357259	0.193548
ENSP00000233809_ENSP00000343925	0.193548
ENSP00000216117_ENSP00000343925	0.193548
ENSP00000343925_ENSP00000373995	0.193548
ENSP00000290866_ENSP00000350766	0.190476
ENSP00000304895_ENSP00000345708	0.1875
ENSP00000287820_ENSP00000251595	0.1875
ENSP00000178638_ENSP00000369713	0.1875
ENSP00000287820_ENSP00000260116	0.1875
ENSP00000304895_ENSP00000264867	0.1875
ENSP00000287820_ENSP00000358903	0.1875
ENSP00000287820_ENSP00000246515	0.1875
ENSP00000287820_ENSP00000355920	0.1875
ENSP00000303830_ENSP00000264867	0.1875
ENSP00000345708_ENSP00000303830	0.1875
ENSP00000325120_ENSP00000230882	0.184211
ENSP00000303830_ENSP00000312652	0.181818
ENSP00000238349_ENSP00000327652	0.181818
ENSP00000304895_ENSP00000357178	0.181818
ENSP00000229768_ENSP00000343645	0.181818
ENSP00000229768_ENSP00000346586	0.181818
ENSP00000303830_ENSP00000221515	0.181818
ENSP00000229768_ENSP00000339221	0.181818
ENSP00000229768_ENSP00000244137	0.181818
ENSP00000229768_ENSP00000221130	0.181818
ENSP00000325120_ENSP00000003084	0.179487
ENSP00000325120_ENSP00000301645	0.179487
ENSP00000325120_ENSP00000342850	0.179487
ENSP00000321334_ENSP00000325120	0.179487
ENSP00000290866_ENSP00000256119	0.178571
ENSP00000272190_ENSP00000178638	0.177215
ENSP00000361099_ENSP00000000442	0.176471
ENSP00000361099_ENSP00000368438	0.176471
ENSP00000361099_ENSP00000355904	0.176471
ENSP00000361099_ENSP00000269593	0.176471
ENSP00000361099_ENSP00000226877	0.176471
ENSP00000361099_ENSP00000370270	0.176471
ENSP00000361099_ENSP00000226444	0.176471
ENSP00000325120_ENSP00000215832	0.171875
ENSP00000206249_ENSP00000370783	0.169811
ENSP00000233809_ENSP00000206249	0.169811
ENSP00000206249_ENSP00000267163	0.169811
ENSP00000347441_ENSP00000350766	0.166667
ENSP00000361099_ENSP00000356969	0.166667
ENSP00000263025_ENSP00000362549	0.166667
ENSP00000343925_ENSP00000003084	0.166667
ENSP00000312652_ENSP00000353731	0.166667
ENSP00000321334_ENSP00000343925	0.166667
ENSP00000359424_ENSP00000256906	0.166667
ENSP00000359478_ENSP00000355904	0.166667
ENSP00000358301_ENSP00000256119	0.166667
ENSP00000355627_ENSP00000178638	0.166667
ENSP00000280097_ENSP00000361666	0.166667
ENSP00000225831_ENSP00000369679	0.166667
ENSP00000347441_ENSP00000229794	0.166667
ENSP00000280097_ENSP00000367102	0.166667
ENSP00000305372_ENSP00000366654	0.166667
ENSP00000225831_ENSP00000358107	0.166667
ENSP00000371971_ENSP00000345659	0.166667
ENSP00000230882_ENSP00000343925	0.166667
ENSP00000359478_ENSP00000370270	0.166667
ENSP00000361099_ENSP00000365980	0.166667
ENSP00000355930_ENSP00000353731	0.166667
ENSP00000272298_ENSP00000261707	0.166667
ENSP00000343925_ENSP00000301645	0.166667
ENSP00000345708_ENSP00000355930	0.166667
ENSP00000256906_ENSP00000259206	0.166667
ENSP00000291295_ENSP00000261707	0.166667
ENSP00000225831_ENSP00000280097	0.166667
ENSP00000304895_ENSP00000370163	0.166667
ENSP00000343925_ENSP00000343925	0.166667
ENSP00000220809_ENSP00000353731	0.166667
ENSP00000295598_ENSP00000300900	0.166667
ENSP00000304895_ENSP00000312649	0.166667
ENSP00000261267_ENSP00000261733	0.166667
ENSP00000370163_ENSP00000353731	0.166667
ENSP00000359478_ENSP00000356969	0.166667
ENSP00000345708_ENSP00000370163	0.166667
ENSP00000225831_ENSP00000367608	0.166667
ENSP00000350766_ENSP00000219070	0.166667
ENSP00000252486_ENSP00000354532	0.166667
ENSP00000370163_ENSP00000255030	0.166667
ENSP00000225831_ENSP00000262502	0.166667
ENSP00000256906_ENSP00000280892	0.166667
ENSP00000261707_ENSP00000327652	0.166667
ENSP00000305372_ENSP00000309649	0.166667
ENSP00000303830_ENSP00000312649	0.166667
ENSP00000355627_ENSP00000354532	0.166667
ENSP00000263025_ENSP00000362505	0.166667
ENSP00000263025_ENSP00000304845	0.166667
ENSP00000357178_ENSP00000353731	0.166667
ENSP00000225831_ENSP00000345659	0.166667
ENSP00000359478_ENSP00000368438	0.166667
ENSP00000303830_ENSP00000371556	0.166667
ENSP00000231449_ENSP00000366109	0.166667
ENSP00000256906_ENSP00000221891	0.166667
ENSP00000221515_ENSP00000353731	0.166667
ENSP00000370163_ENSP00000227665	0.166667
ENSP00000300900_ENSP00000219070	0.166667
ENSP00000347441_ENSP00000318912	0.166667
ENSP00000342850_ENSP00000206249	0.166667
ENSP00000347441_ENSP00000260433	0.166667
ENSP00000256906_ENSP00000327082	0.166667
ENSP00000371971_ENSP00000367608	0.166667
ENSP00000223095_ENSP00000358424	0.166667
ENSP00000359478_ENSP00000226877	0.166667
ENSP00000336528_ENSP00000372002	0.166667
ENSP00000251595_ENSP00000236996	0.166667
ENSP00000303830_ENSP00000220809	0.166667
ENSP00000359478_ENSP00000330021	0.166667
ENSP00000336528_ENSP00000350815	0.166667
ENSP00000052754_ENSP00000280097	0.166667
ENSP00000342850_ENSP00000343925	0.166667
ENSP00000359478_ENSP00000000442	0.166667
ENSP00000304895_ENSP00000371556	0.166667
ENSP00000264381_ENSP00000217176	0.166667
ENSP00000336528_ENSP00000363822	0.166667
ENSP00000364469_ENSP00000354532	0.166667
ENSP00000358301_ENSP00000178638	0.166667
ENSP00000303830_ENSP00000355930	0.166667
ENSP00000355627_ENSP00000350766	0.166667
ENSP00000252321_ENSP00000219833	0.166667
ENSP00000269305_ENSP00000372002	0.166667
ENSP00000287820_ENSP00000370163	0.166667
ENSP00000356671_ENSP00000261733	0.166667
ENSP00000328264_ENSP00000290291	0.166667
ENSP00000269305_ENSP00000363822	0.166667
ENSP00000295598_ENSP00000318912	0.166667
ENSP00000269305_ENSP00000274192	0.166667
ENSP00000263611_ENSP00000300900	0.166667
ENSP00000305372_ENSP00000229264	0.166667
ENSP00000311032_ENSP00000354532	0.166667
ENSP00000280097_ENSP00000366816	0.166667
ENSP00000359478_ENSP00000226444	0.166667
ENSP00000256906_ENSP00000172229	0.166667
ENSP00000364469_ENSP00000365980	0.166667
ENSP00000336528_ENSP00000274192	0.166667
ENSP00000349467_ENSP00000261707	0.166667
ENSP00000262735_ENSP00000370163	0.166667
ENSP00000342560_ENSP00000228740	0.166667
ENSP00000371971_ENSP00000369679	0.166667
ENSP00000359478_ENSP00000269593	0.166667
ENSP00000361099_ENSP00000330021	0.166667
ENSP00000347441_ENSP00000329623	0.166667
ENSP00000256906_ENSP00000362508	0.166667
ENSP00000339151_ENSP00000359478	0.166667
ENSP00000373298_ENSP00000217176	0.166667
ENSP00000318912_ENSP00000219070	0.166667
ENSP00000342560_ENSP00000363512	0.166667
ENSP00000285930_ENSP00000261733	0.166667
ENSP00000269305_ENSP00000350815	0.166667
ENSP00000370163_ENSP00000236996	0.166667
ENSP00000355627_ENSP00000300900	0.166667
ENSP00000295598_ENSP00000350766	0.166667
ENSP00000345708_ENSP00000220809	0.166667
ENSP00000206249_ENSP00000357259	0.163636
ENSP00000206249_ENSP00000373995	0.163636
ENSP00000290866_ENSP00000178638	0.163636
ENSP00000216117_ENSP00000206249	0.163636
ENSP00000325120_ENSP00000302665	0.16129
ENSP00000370290_ENSP00000229264	0.157895
ENSP00000370290_ENSP00000309649	0.157895
ENSP00000370290_ENSP00000366654	0.157895
ENSP00000325120_ENSP00000338742	0.15625
ENSP00000325120_ENSP00000228872	0.15625
ENSP00000319984_ENSP00000284981	0.153846
ENSP00000374621_ENSP00000229264	0.153846
ENSP00000319984_ENSP00000240132	0.153846
ENSP00000346887_ENSP00000356537	0.153846
ENSP00000374621_ENSP00000366654	0.153846
ENSP00000319984_ENSP00000293761	0.153846
ENSP00000374621_ENSP00000369510	0.153846
ENSP00000374621_ENSP00000316970	0.153846
ENSP00000350037_ENSP00000176195	0.153846
ENSP00000374621_ENSP00000309649	0.153846
ENSP00000319984_ENSP00000284384	0.153846
ENSP00000346887_ENSP00000294954	0.153846
ENSP00000374621_ENSP00000229416	0.153846
ENSP00000346887_ENSP00000324248	0.153846
ENSP00000346887_ENSP00000343877	0.153846
ENSP00000346887_ENSP00000318867	0.153846
ENSP00000343925_ENSP00000215832	0.153846
ENSP00000302665_ENSP00000343925	0.153846
ENSP00000374621_ENSP00000371517	0.153846
ENSP00000343925_ENSP00000228872	0.153846
ENSP00000346887_ENSP00000299022	0.153846
ENSP00000346887_ENSP00000373468	0.153846
ENSP00000261707_ENSP00000238349	0.153846
ENSP00000319984_ENSP00000251535	0.153846
ENSP00000374621_ENSP00000284981	0.153846
ENSP00000374621_ENSP00000216951	0.153846
ENSP00000346887_ENSP00000359380	0.153846
ENSP00000346887_ENSP00000053867	0.153846
ENSP00000346887_ENSP00000324270	0.153846
ENSP00000350037_ENSP00000367391	0.153846
ENSP00000346887_ENSP00000215539	0.153846
ENSP00000346887_ENSP00000344936	0.153846
ENSP00000374621_ENSP00000293761	0.153846
ENSP00000346887_ENSP00000280357	0.153846
ENSP00000343925_ENSP00000338742	0.153846
ENSP00000374621_ENSP00000245206	0.153846
ENSP00000350037_ENSP00000225992	0.153846
ENSP00000346887_ENSP00000227666	0.153846
ENSP00000346887_ENSP00000355906	0.153846
ENSP00000346887_ENSP00000322229	0.153846
ENSP00000346887_ENSP00000323889	0.153846
ENSP00000250080_ENSP00000320940	0.153846
ENSP00000346887_ENSP00000306780	0.153846
ENSP00000346887_ENSP00000264613	0.153846
ENSP00000374621_ENSP00000305651	0.153846
ENSP00000374621_ENSP00000359539	0.153846
ENSP00000346887_ENSP00000265643	0.153846
ENSP00000374621_ENSP00000335544	0.153846
ENSP00000374621_ENSP00000251535	0.153846
ENSP00000319984_ENSP00000371517	0.153846
ENSP00000319984_ENSP00000316970	0.153846
ENSP00000350037_ENSP00000357461	0.153846
ENSP00000346887_ENSP00000226413	0.153846
ENSP00000346887_ENSP00000343155	0.153846
ENSP00000319984_ENSP00000369510	0.153846
ENSP00000346887_ENSP00000330341	0.153846
ENSP00000346887_ENSP00000308938	0.153846
ENSP00000374621_ENSP00000354279	0.153846
ENSP00000319984_ENSP00000362816	0.153846
ENSP00000343925_ENSP00000250080	0.150943
ENSP00000234961_ENSP00000339221	0.15
ENSP00000234961_ENSP00000221130	0.15
ENSP00000311508_ENSP00000316136	0.15
ENSP00000234961_ENSP00000343645	0.15
ENSP00000311508_ENSP00000264867	0.15
ENSP00000316136_ENSP00000361848	0.15
ENSP00000361848_ENSP00000264867	0.15
ENSP00000250080_ENSP00000329623	0.15
ENSP00000234961_ENSP00000244137	0.15
ENSP00000234961_ENSP00000346586	0.15
ENSP00000337450_ENSP00000269577	0.15
ENSP00000347441_ENSP00000338742	0.15
ENSP00000250080_ENSP00000260433	0.15
ENSP00000265572_ENSP00000345282	0.148148
ENSP00000265572_ENSP00000346821	0.148148
ENSP00000265572_ENSP00000321988	0.148148
ENSP00000265572_ENSP00000215754	0.148148
ENSP00000260600_ENSP00000345659	0.142857
ENSP00000250080_ENSP00000221130	0.142857
ENSP00000260600_ENSP00000369679	0.142857
ENSP00000340684_ENSP00000172229	0.142857
ENSP00000250080_ENSP00000258149	0.142857
ENSP00000306490_ENSP00000316970	0.142857
ENSP00000312126_ENSP00000345659	0.142857
ENSP00000294016_ENSP00000345659	0.142857
ENSP00000285238_ENSP00000269577	0.142857
ENSP00000340684_ENSP00000221891	0.142857
ENSP00000294016_ENSP00000369679	0.142857
ENSP00000347754_ENSP00000343645	0.142857
ENSP00000306490_ENSP00000362816	0.142857
ENSP00000252321_ENSP00000350037	0.142857
ENSP00000250080_ENSP00000361965	0.142857
ENSP00000359424_ENSP00000340684	0.142857
ENSP00000340684_ENSP00000327082	0.142857
ENSP00000206249_ENSP00000363777	0.142857
ENSP00000340684_ENSP00000280892	0.142857
ENSP00000257763_ENSP00000369679	0.142857
ENSP00000250080_ENSP00000372002	0.142857
ENSP00000306490_ENSP00000284981	0.142857
ENSP00000311405_ENSP00000345659	0.142857
ENSP00000206249_ENSP00000003084	0.142857
ENSP00000257763_ENSP00000345659	0.142857
ENSP00000250080_ENSP00000274192	0.142857
ENSP00000260600_ENSP00000367608	0.142857
ENSP00000340684_ENSP00000362508	0.142857
ENSP00000297323_ENSP00000367608	0.142857
ENSP00000250080_ENSP00000363822	0.142857
ENSP00000306490_ENSP00000369510	0.142857
ENSP00000311405_ENSP00000367608	0.142857
ENSP00000347754_ENSP00000339221	0.142857
ENSP00000347754_ENSP00000244137	0.142857
ENSP00000257763_ENSP00000367608	0.142857
ENSP00000294016_ENSP00000367608	0.142857
ENSP00000311405_ENSP00000369679	0.142857
ENSP00000306490_ENSP00000284384	0.142857
ENSP00000286355_ENSP00000369679	0.142857
ENSP00000306490_ENSP00000240132	0.142857
ENSP00000254235_ENSP00000367608	0.142857
ENSP00000306490_ENSP00000293761	0.142857
ENSP00000321334_ENSP00000206249	0.142857
ENSP00000340684_ENSP00000259206	0.142857
ENSP00000306490_ENSP00000251535	0.142857
ENSP00000347754_ENSP00000346586	0.142857
ENSP00000250080_ENSP00000282561	0.142857
ENSP00000254235_ENSP00000345659	0.142857
ENSP00000252321_ENSP00000340684	0.142857
ENSP00000206249_ENSP00000301645	0.142857
ENSP00000312126_ENSP00000367608	0.142857
ENSP00000297323_ENSP00000369679	0.142857
ENSP00000254235_ENSP00000369679	0.142857
ENSP00000312126_ENSP00000369679	0.142857
ENSP00000250080_ENSP00000350815	0.142857
ENSP00000297323_ENSP00000345659	0.142857
ENSP00000280097_ENSP00000304811	0.142857
ENSP00000250080_ENSP00000365980	0.142857
ENSP00000206249_ENSP00000360833	0.142857
ENSP00000276449_ENSP00000250080	0.142857
ENSP00000285238_ENSP00000354532	0.142857
ENSP00000285238_ENSP00000224237	0.142857
ENSP00000230882_ENSP00000206249	0.142857
ENSP00000286355_ENSP00000367608	0.142857
ENSP00000286355_ENSP00000345659	0.142857
ENSP00000306490_ENSP00000371517	0.142857
ENSP00000347754_ENSP00000221130	0.142857
ENSP00000325120_ENSP00000367207	0.137255
ENSP00000356823_ENSP00000369679	0.136364
ENSP00000356823_ENSP00000367608	0.136364
ENSP00000356823_ENSP00000345659	0.136364
ENSP00000325120_ENSP00000219070	0.134615
ENSP00000325120_ENSP00000313088	0.134615
ENSP00000325120_ENSP00000356671	0.134615
ENSP00000287936_ENSP00000325120	0.134615
ENSP00000325120_ENSP00000227665	0.134615
ENSP00000252444_ENSP00000325120	0.134615
ENSP00000206249_ENSP00000215832	0.134328
ENSP00000302665_ENSP00000206249	0.134328
ENSP00000206249_ENSP00000228872	0.134328
ENSP00000206249_ENSP00000338742	0.134328
ENSP00000347299_ENSP00000293761	0.133333
ENSP00000342560_ENSP00000237014	0.133333
ENSP00000346625_ENSP00000252809	0.133333
ENSP00000046967_ENSP00000309649	0.133333
ENSP00000311508_ENSP00000312649	0.133333
ENSP00000356066_ENSP00000300900	0.133333
ENSP00000347299_ENSP00000369510	0.133333
ENSP00000238349_ENSP00000373169	0.133333
ENSP00000361848_ENSP00000261733	0.133333
ENSP00000221515_ENSP00000361848	0.133333
ENSP00000370163_ENSP00000309757	0.133333
ENSP00000046967_ENSP00000369510	0.133333
ENSP00000238349_ENSP00000176183	0.133333
ENSP00000346625_ENSP00000305221	0.133333
ENSP00000346625_ENSP00000362549	0.133333
ENSP00000336528_ENSP00000325120	0.133333
ENSP00000046967_ENSP00000366654	0.133333
ENSP00000343782_ENSP00000366654	0.133333
ENSP00000360786_ENSP00000238349	0.133333
ENSP00000229135_ENSP00000342560	0.133333
ENSP00000229135_ENSP00000366109	0.133333
ENSP00000347299_ENSP00000371517	0.133333
ENSP00000367309_ENSP00000306129	0.133333
ENSP00000357178_ENSP00000361848	0.133333
ENSP00000361848_ENSP00000371556	0.133333
ENSP00000343782_ENSP00000251535	0.133333
ENSP00000046967_ENSP00000371517	0.133333
ENSP00000346625_ENSP00000318585	0.133333
ENSP00000347299_ENSP00000284981	0.133333
ENSP00000327251_ENSP00000261733	0.133333
ENSP00000311508_ENSP00000357178	0.133333
ENSP00000343782_ENSP00000369510	0.133333
ENSP00000311508_ENSP00000371556	0.133333
ENSP00000346625_ENSP00000304845	0.133333
ENSP00000343782_ENSP00000284981	0.133333
ENSP00000342560_ENSP00000279178	0.133333
ENSP00000358301_ENSP00000374454	0.133333
ENSP00000346625_ENSP00000355930	0.133333
ENSP00000346625_ENSP00000362534	0.133333
ENSP00000361848_ENSP00000312649	0.133333
ENSP00000046967_ENSP00000251535	0.133333
ENSP00000343782_ENSP00000316970	0.133333
ENSP00000328264_ENSP00000336764	0.133333
ENSP00000311508_ENSP00000363868	0.133333
ENSP00000346625_ENSP00000260433	0.133333
ENSP00000346625_ENSP00000362505	0.133333
ENSP00000046967_ENSP00000229264	0.133333
ENSP00000327251_ENSP00000342560	0.133333
ENSP00000347299_ENSP00000251535	0.133333
ENSP00000342560_ENSP00000367309	0.133333
ENSP00000325120_ENSP00000269305	0.133333
ENSP00000311508_ENSP00000357068	0.133333
ENSP00000046967_ENSP00000284981	0.133333
ENSP00000347299_ENSP00000316970	0.133333
ENSP00000327251_ENSP00000241052	0.133333
ENSP00000343782_ENSP00000229264	0.133333
ENSP00000343782_ENSP00000309649	0.133333
ENSP00000046967_ENSP00000316970	0.133333
ENSP00000361405_ENSP00000370163	0.133333
ENSP00000367309_ENSP00000327652	0.133333
ENSP00000343782_ENSP00000293761	0.133333
ENSP00000346625_ENSP00000346768	0.133333
ENSP00000363748_ENSP00000300900	0.133333
ENSP00000343782_ENSP00000371517	0.133333
ENSP00000357068_ENSP00000361848	0.133333
ENSP00000304895_ENSP00000303830	0.133333
ENSP00000046967_ENSP00000293761	0.133333
ENSP00000258400_ENSP00000373169	0.130435
ENSP00000258400_ENSP00000176183	0.130435
ENSP00000336528_ENSP00000343925	0.12766
ENSP00000269305_ENSP00000343925	0.12766
ENSP00000206249_ENSP00000250080	0.126316
ENSP00000369050_ENSP00000363822	0.125
ENSP00000308685_ENSP00000367608	0.125
ENSP00000331108_ENSP00000221891	0.125
ENSP00000285379_ENSP00000368393	0.125
ENSP00000343925_ENSP00000362659	0.125
ENSP00000369050_ENSP00000372002	0.125
ENSP00000304895_ENSP00000353731	0.125
ENSP00000308685_ENSP00000345659	0.125
ENSP00000178638_ENSP00000219070	0.125
ENSP00000331108_ENSP00000259206	0.125
ENSP00000343925_ENSP00000360833	0.125
ENSP00000360372_ENSP00000215539	0.125
ENSP00000308685_ENSP00000369679	0.125
ENSP00000256119_ENSP00000219070	0.125
ENSP00000361099_ENSP00000260433	0.125
ENSP00000360372_ENSP00000226413	0.125
ENSP00000343925_ENSP00000365016	0.125
ENSP00000360372_ENSP00000373468	0.125
ENSP00000331108_ENSP00000172229	0.125
ENSP00000360372_ENSP00000322229	0.125
ENSP00000273430_ENSP00000285379	0.125
ENSP00000343925_ENSP00000274192	0.125
ENSP00000366903_ENSP00000285379	0.125
ENSP00000370171_ENSP00000178638	0.125
ENSP00000306662_ENSP00000251535	0.125
ENSP00000347441_ENSP00000357259	0.125
ENSP00000360372_ENSP00000280357	0.125
ENSP00000360372_ENSP00000344936	0.125
ENSP00000216117_ENSP00000347441	0.125
ENSP00000306662_ENSP00000369510	0.125
ENSP00000295598_ENSP00000256119	0.125
ENSP00000356438_ENSP00000280097	0.125
ENSP00000343925_ENSP00000356671	0.125
ENSP00000306245_ENSP00000350815	0.125
ENSP00000360372_ENSP00000323889	0.125
ENSP00000347441_ENSP00000267163	0.125
ENSP00000306245_ENSP00000274192	0.125
ENSP00000360372_ENSP00000306780	0.125
ENSP00000331108_ENSP00000327082	0.125
ENSP00000287820_ENSP00000312652	0.125
ENSP00000261707_ENSP00000176183	0.125
ENSP00000369050_ENSP00000274192	0.125
ENSP00000331108_ENSP00000362508	0.125
ENSP00000369050_ENSP00000350815	0.125
ENSP00000343925_ENSP00000356253	0.125
ENSP00000256958_ENSP00000354532	0.125
ENSP00000301141_ENSP00000350815	0.125
ENSP00000285379_ENSP00000300061	0.125
ENSP00000360372_ENSP00000324248	0.125
ENSP00000343925_ENSP00000302728	0.125
ENSP00000360372_ENSP00000264613	0.125
ENSP00000219833_ENSP00000373169	0.125
ENSP00000343925_ENSP00000280892	0.125
ENSP00000301141_ENSP00000363822	0.125
ENSP00000343925_ENSP00000350815	0.125
ENSP00000231449_ENSP00000343205	0.125
ENSP00000343925_ENSP00000309572	0.125
ENSP00000360372_ENSP00000324270	0.125
ENSP00000285379_ENSP00000360973	0.125
ENSP00000285379_ENSP00000353292	0.125
ENSP00000347441_ENSP00000370783	0.125
ENSP00000261707_ENSP00000373169	0.125
ENSP00000295598_ENSP00000178638	0.125
ENSP00000360372_ENSP00000053867	0.125
ENSP00000343925_ENSP00000268035	0.125
ENSP00000360372_ENSP00000294954	0.125
ENSP00000252444_ENSP00000343925	0.125
ENSP00000306662_ENSP00000284981	0.125
ENSP00000306662_ENSP00000316970	0.125
ENSP00000343925_ENSP00000227665	0.125
ENSP00000343925_ENSP00000225964	0.125
ENSP00000285379_ENSP00000302874	0.125
ENSP00000360372_ENSP00000299022	0.125
ENSP00000343925_ENSP00000372002	0.125
ENSP00000343925_ENSP00000361063	0.125
ENSP00000360786_ENSP00000261707	0.125
ENSP00000301141_ENSP00000372002	0.125
ENSP00000233242_ENSP00000350815	0.125
ENSP00000343925_ENSP00000313088	0.125
ENSP00000306245_ENSP00000372002	0.125
ENSP00000361099_ENSP00000329623	0.125
ENSP00000355627_ENSP00000256119	0.125
ENSP00000360372_ENSP00000227666	0.125
ENSP00000331108_ENSP00000280892	0.125
ENSP00000360372_ENSP00000343877	0.125
ENSP00000343925_ENSP00000363822	0.125
ENSP00000219833_ENSP00000176183	0.125
ENSP00000347441_ENSP00000178638	0.125
ENSP00000233809_ENSP00000347441	0.125
ENSP00000287820_ENSP00000357178	0.125
ENSP00000287820_ENSP00000355930	0.125
ENSP00000303830_ENSP00000353731	0.125
ENSP00000343925_ENSP00000219070	0.125
ENSP00000216117_ENSP00000359478	0.125
ENSP00000360372_ENSP00000308938	0.125
ENSP00000360372_ENSP00000330341	0.125
ENSP00000343925_ENSP00000225929	0.125
ENSP00000319713_ENSP00000285379	0.125
ENSP00000343925_ENSP00000346586	0.125
ENSP00000360372_ENSP00000355906	0.125
ENSP00000301141_ENSP00000274192	0.125
ENSP00000343925_ENSP00000259206	0.125
ENSP00000367207_ENSP00000343925	0.125
ENSP00000233242_ENSP00000363822	0.125
ENSP00000360372_ENSP00000318867	0.125
ENSP00000265572_ENSP00000290291	0.125
ENSP00000233242_ENSP00000274192	0.125
ENSP00000306245_ENSP00000363822	0.125
ENSP00000343925_ENSP00000251849	0.125
ENSP00000370171_ENSP00000228740	0.125
ENSP00000360372_ENSP00000359380	0.125
ENSP00000287820_ENSP00000220809	0.125
ENSP00000263611_ENSP00000178638	0.125
ENSP00000233242_ENSP00000372002	0.125
ENSP00000343925_ENSP00000320401	0.125
ENSP00000231449_ENSP00000347441	0.125
ENSP00000360372_ENSP00000265643	0.125
ENSP00000347441_ENSP00000373995	0.125
ENSP00000287820_ENSP00000221515	0.125
ENSP00000359424_ENSP00000331108	0.125
ENSP00000306662_ENSP00000293761	0.125
ENSP00000287936_ENSP00000343925	0.125
ENSP00000360372_ENSP00000343155	0.125
ENSP00000360372_ENSP00000356537	0.125
ENSP00000306662_ENSP00000371517	0.125
ENSP00000343925_ENSP00000227507	0.125
ENSP00000263611_ENSP00000256119	0.125
ENSP00000231449_ENSP00000324820	0.125
ENSP00000325120_ENSP00000343925	0.123596
ENSP00000229768_ENSP00000346821	0.121212
ENSP00000229768_ENSP00000321988	0.121212
ENSP00000229768_ENSP00000215754	0.121212
ENSP00000229768_ENSP00000345282	0.121212
ENSP00000346625_ENSP00000279178	0.12
ENSP00000216117_ENSP00000250080	0.12
ENSP00000368766_ENSP00000371517	0.117647
ENSP00000223095_ENSP00000358903	0.117647
ENSP00000277010_ENSP00000336764	0.117647
ENSP00000361099_ENSP00000282561	0.117647
ENSP00000368766_ENSP00000316970	0.117647
ENSP00000368766_ENSP00000293761	0.117647
ENSP00000223095_ENSP00000256104	0.117647
ENSP00000368766_ENSP00000369510	0.117647
ENSP00000289753_ENSP00000238349	0.117647
ENSP00000368766_ENSP00000251535	0.117647
ENSP00000223095_ENSP00000319814	0.117647
ENSP00000368766_ENSP00000284981	0.117647
ENSP00000258400_ENSP00000327652	0.117647
ENSP00000250080_ENSP00000338742	0.117647
ENSP00000325120_ENSP00000250080	0.117647
ENSP00000361099_ENSP00000343925	0.115942
ENSP00000325120_ENSP00000361063	0.115385
ENSP00000325120_ENSP00000251849	0.115385
ENSP00000360317_ENSP00000344789	0.115385
ENSP00000346887_ENSP00000269593	0.115385
ENSP00000346887_ENSP00000276449	0.115385
ENSP00000252519_ENSP00000252519	0.115385
ENSP00000360317_ENSP00000229328	0.115385
ENSP00000325120_ENSP00000360833	0.115385
ENSP00000346887_ENSP00000370270	0.115385
ENSP00000346887_ENSP00000000442	0.115385
ENSP00000223095_ENSP00000221515	0.115385
ENSP00000325120_ENSP00000280892	0.115385
ENSP00000360317_ENSP00000366654	0.115385
ENSP00000325120_ENSP00000225929	0.115385
ENSP00000325120_ENSP00000227507	0.115385
ENSP00000325120_ENSP00000259206	0.115385
ENSP00000223095_ENSP00000357178	0.115385
ENSP00000346887_ENSP00000368438	0.115385
ENSP00000269305_ENSP00000206249	0.115385
ENSP00000325120_ENSP00000268035	0.115385
ENSP00000360317_ENSP00000309649	0.115385
ENSP00000325120_ENSP00000365016	0.115385
ENSP00000361099_ENSP00000337127	0.115385
ENSP00000360317_ENSP00000341044	0.115385
ENSP00000325120_ENSP00000302728	0.115385
ENSP00000346887_ENSP00000355904	0.115385
ENSP00000360317_ENSP00000360290	0.115385
ENSP00000325120_ENSP00000309572	0.115385
ENSP00000360317_ENSP00000229264	0.115385
ENSP00000325120_ENSP00000362659	0.115385
ENSP00000346887_ENSP00000226444	0.115385
ENSP00000360317_ENSP00000275525	0.115385
ENSP00000346887_ENSP00000226877	0.115385
ENSP00000325120_ENSP00000225964	0.115385
ENSP00000325120_ENSP00000356253	0.115385
ENSP00000325120_ENSP00000346586	0.115385
ENSP00000325120_ENSP00000320401	0.115385
ENSP00000225831_ENSP00000300900	0.111111
ENSP00000223095_ENSP00000303960	0.111111
ENSP00000250080_ENSP00000370783	0.111111
ENSP00000305372_ENSP00000367608	0.111111
ENSP00000361099_ENSP00000363822	0.111111
ENSP00000305372_ENSP00000316970	0.111111
ENSP00000256906_ENSP00000346768	0.111111
ENSP00000299855_ENSP00000359478	0.111111
ENSP00000256906_ENSP00000362505	0.111111
ENSP00000258743_ENSP00000280097	0.111111
ENSP00000258743_ENSP00000269577	0.111111
ENSP00000219833_ENSP00000327652	0.111111
ENSP00000305372_ENSP00000371517	0.111111
ENSP00000305372_ENSP00000369510	0.111111
ENSP00000364469_ENSP00000370163	0.111111
ENSP00000305372_ENSP00000358107	0.111111
ENSP00000223095_ENSP00000341479	0.111111
ENSP00000321334_ENSP00000359478	0.111111
ENSP00000256906_ENSP00000355930	0.111111
ENSP00000223095_ENSP00000268712	0.111111
ENSP00000206249_ENSP00000225929	0.111111
ENSP00000223095_ENSP00000365016	0.111111
ENSP00000348729_ENSP00000293761	0.111111
ENSP00000223095_ENSP00000264867	0.111111
ENSP00000342560_ENSP00000366816	0.111111
ENSP00000348729_ENSP00000369510	0.111111
ENSP00000305372_ENSP00000284981	0.111111
ENSP00000361099_ENSP00000361965	0.111111
ENSP00000223095_ENSP00000358107	0.111111
ENSP00000223095_ENSP00000353916	0.111111
ENSP00000265572_ENSP00000263341	0.111111
ENSP00000223095_ENSP00000309124	0.111111
ENSP00000258743_ENSP00000354532	0.111111
ENSP00000371971_ENSP00000300900	0.111111
ENSP00000223095_ENSP00000364494	0.111111
ENSP00000359478_ENSP00000260433	0.111111
ENSP00000252486_ENSP00000370163	0.111111
ENSP00000305372_ENSP00000262502	0.111111
ENSP00000361099_ENSP00000320940	0.111111
ENSP00000052754_ENSP00000342560	0.111111
ENSP00000361099_ENSP00000350815	0.111111
ENSP00000305372_ENSP00000345659	0.111111
ENSP00000361099_ENSP00000280097	0.111111
ENSP00000256906_ENSP00000252809	0.111111
ENSP00000348729_ENSP00000251535	0.111111
ENSP00000359478_ENSP00000337127	0.111111
ENSP00000258743_ENSP00000372002	0.111111
ENSP00000305372_ENSP00000369679	0.111111
ENSP00000357259_ENSP00000250080	0.111111
ENSP00000258400_ENSP00000360786	0.111111
ENSP00000223095_ENSP00000262502	0.111111
ENSP00000342560_ENSP00000367102	0.111111
ENSP00000342560_ENSP00000361666	0.111111
ENSP00000356958_ENSP00000265572	0.111111
ENSP00000206249_ENSP00000361063	0.111111
ENSP00000231509_ENSP00000269577	0.111111
ENSP00000361099_ENSP00000333769	0.111111
ENSP00000225831_ENSP00000318912	0.111111
ENSP00000256906_ENSP00000305221	0.111111
ENSP00000256906_ENSP00000362549	0.111111
ENSP00000250080_ENSP00000373995	0.111111
ENSP00000258743_ENSP00000350815	0.111111
ENSP00000206249_ENSP00000225964	0.111111
ENSP00000258743_ENSP00000363822	0.111111
ENSP00000223095_ENSP00000331698	0.111111
ENSP00000223095_ENSP00000345659	0.111111
ENSP00000348729_ENSP00000371517	0.111111
ENSP00000258743_ENSP00000274192	0.111111
ENSP00000305372_ENSP00000293761	0.111111
ENSP00000225831_ENSP00000342560	0.111111
ENSP00000234961_ENSP00000290291	0.111111
ENSP00000256906_ENSP00000260433	0.111111
ENSP00000223095_ENSP00000328150	0.111111
ENSP00000361099_ENSP00000221130	0.111111
ENSP00000223095_ENSP00000348918	0.111111
ENSP00000359478_ENSP00000329623	0.111111
ENSP00000361099_ENSP00000274192	0.111111
ENSP00000258400_ENSP00000238349	0.111111
ENSP00000373298_ENSP00000350037	0.111111
ENSP00000361099_ENSP00000276449	0.111111
ENSP00000225831_ENSP00000350766	0.111111
ENSP00000256906_ENSP00000318585	0.111111
ENSP00000250080_ENSP00000267163	0.111111
ENSP00000206249_ENSP00000227507	0.111111
ENSP00000223095_ENSP00000316136	0.111111
ENSP00000223095_ENSP00000369679	0.111111
ENSP00000256906_ENSP00000304845	0.111111
ENSP00000233809_ENSP00000250080	0.111111
ENSP00000350037_ENSP00000264381	0.111111
ENSP00000206249_ENSP00000309572	0.111111
ENSP00000305372_ENSP00000251535	0.111111
ENSP00000223095_ENSP00000367608	0.111111
ENSP00000348729_ENSP00000284981	0.111111
ENSP00000348729_ENSP00000316970	0.111111
ENSP00000223095_ENSP00000320940	0.111111
ENSP00000206249_ENSP00000356253	0.111111
ENSP00000361099_ENSP00000372002	0.111111
ENSP00000256906_ENSP00000362534	0.111111
ENSP00000223095_ENSP00000357068	0.111111
ENSP00000361099_ENSP00000258149	0.111111
ENSP00000371971_ENSP00000219891	0.111111
ENSP00000325120_ENSP00000325120	0.10989
ENSP00000356066_ENSP00000325120	0.109375
ENSP00000367207_ENSP00000206249	0.109091
ENSP00000325120_ENSP00000301141	0.108911
ENSP00000336528_ENSP00000206249	0.108434
ENSP00000325120_ENSP00000309757	0.107692
ENSP00000361405_ENSP00000325120	0.107692
ENSP00000206249_ENSP00000227665	0.107143
ENSP00000257763_ENSP00000176183	0.107143
ENSP00000287936_ENSP00000206249	0.107143
ENSP00000206249_ENSP00000313088	0.107143
ENSP00000337915_ENSP00000366654	0.107143
ENSP00000252444_ENSP00000206249	0.107143
ENSP00000206249_ENSP00000320401	0.107143
ENSP00000206249_ENSP00000362659	0.107143
ENSP00000206249_ENSP00000365016	0.107143
ENSP00000206249_ENSP00000280892	0.107143
ENSP00000206249_ENSP00000302728	0.107143
ENSP00000206249_ENSP00000268035	0.107143
ENSP00000206249_ENSP00000356671	0.107143
ENSP00000337915_ENSP00000229264	0.107143
ENSP00000206249_ENSP00000346586	0.107143
ENSP00000337915_ENSP00000309649	0.107143
ENSP00000257763_ENSP00000373169	0.107143
ENSP00000206249_ENSP00000251849	0.107143
ENSP00000343925_ENSP00000206249	0.107143
ENSP00000206249_ENSP00000259206	0.107143
ENSP00000250080_ENSP00000250080	0.107143
ENSP00000206249_ENSP00000219070	0.107143
ENSP00000343925_ENSP00000359478	0.106383
ENSP00000265724_ENSP00000299964	0.105263
ENSP00000311508_ENSP00000303830	0.105263
ENSP00000361308_ENSP00000337450	0.105263
ENSP00000289753_ENSP00000261707	0.105263
ENSP00000289753_ENSP00000373169	0.105263
ENSP00000353827_ENSP00000337450	0.105263
ENSP00000303830_ENSP00000361848	0.105263
ENSP00000348234_ENSP00000337450	0.105263
ENSP00000265724_ENSP00000375066	0.105263
ENSP00000257497_ENSP00000337450	0.105263
ENSP00000265447_ENSP00000337450	0.105263
ENSP00000316786_ENSP00000337450	0.105263
ENSP00000262219_ENSP00000337450	0.105263
ENSP00000265724_ENSP00000296202	0.105263
ENSP00000265724_ENSP00000276844	0.105263
ENSP00000361305_ENSP00000337450	0.105263
ENSP00000289753_ENSP00000176183	0.105263
ENSP00000265724_ENSP00000219771	0.105263
ENSP00000265724_ENSP00000328742	0.105263
ENSP00000352248_ENSP00000337450	0.105263
ENSP00000252519_ENSP00000285379	0.104167
ENSP00000325120_ENSP00000359478	0.103896
ENSP00000325120_ENSP00000350766	0.102564
ENSP00000325120_ENSP00000233242	0.102041
ENSP00000345708_ENSP00000361848	0.1
ENSP00000311508_ENSP00000255030	0.1
ENSP00000229135_ENSP00000347441	0.1
ENSP00000355527_ENSP00000327082	0.1
ENSP00000370171_ENSP00000237014	0.1
ENSP00000367309_ENSP00000176183	0.1
ENSP00000370171_ENSP00000229135	0.1
ENSP00000343782_ENSP00000345659	0.1
ENSP00000361405_ENSP00000343925	0.1
ENSP00000354612_ENSP00000280097	0.1
ENSP00000359424_ENSP00000355527	0.1
ENSP00000265572_ENSP00000336764	0.1
ENSP00000337450_ENSP00000354532	0.1
ENSP00000046967_ENSP00000367608	0.1
ENSP00000346625_ENSP00000367102	0.1
ENSP00000363748_ENSP00000256119	0.1
ENSP00000361848_ENSP00000353731	0.1
ENSP00000046967_ENSP00000358107	0.1
ENSP00000356066_ENSP00000343925	0.1
ENSP00000343782_ENSP00000367608	0.1
ENSP00000046967_ENSP00000262502	0.1
ENSP00000346625_ENSP00000363512	0.1
ENSP00000343925_ENSP00000309757	0.1
ENSP00000347299_ENSP00000219833	0.1
ENSP00000355527_ENSP00000318585	0.1
ENSP00000311508_ENSP00000353731	0.1
ENSP00000355527_ENSP00000362508	0.1
ENSP00000355527_ENSP00000280892	0.1
ENSP00000229768_ENSP00000290291	0.1
ENSP00000356066_ENSP00000178638	0.1
ENSP00000355527_ENSP00000172229	0.1
ENSP00000234961_ENSP00000321988	0.1
ENSP00000229135_ENSP00000324820	0.1
ENSP00000328264_ENSP00000277010	0.1
ENSP00000355527_ENSP00000259206	0.1
ENSP00000302665_ENSP00000347441	0.1
ENSP00000346625_ENSP00000361666	0.1
ENSP00000234961_ENSP00000346821	0.1
ENSP00000355527_ENSP00000221891	0.1
ENSP00000356066_ENSP00000256119	0.1
ENSP00000046967_ENSP00000345659	0.1
ENSP00000367309_ENSP00000373169	0.1
ENSP00000234961_ENSP00000215754	0.1
ENSP00000046967_ENSP00000369679	0.1
ENSP00000347441_ENSP00000228872	0.1
ENSP00000363748_ENSP00000178638	0.1
ENSP00000311508_ENSP00000345708	0.1
ENSP00000343782_ENSP00000262502	0.1
ENSP00000343782_ENSP00000358107	0.1
ENSP00000229135_ENSP00000343205	0.1
ENSP00000347441_ENSP00000299198	0.1
ENSP00000316244_ENSP00000369679	0.1
ENSP00000052754_ENSP00000346625	0.1
ENSP00000316244_ENSP00000345659	0.1
ENSP00000346625_ENSP00000228740	0.1
ENSP00000316244_ENSP00000367608	0.1
ENSP00000347441_ENSP00000215832	0.1
ENSP00000231449_ENSP00000327251	0.1
ENSP00000346625_ENSP00000366816	0.1
ENSP00000342850_ENSP00000250080	0.1
ENSP00000234961_ENSP00000345282	0.1
ENSP00000258400_ENSP00000289753	0.1
ENSP00000343782_ENSP00000369679	0.1
ENSP00000343925_ENSP00000306245	0.0983607
ENSP00000233242_ENSP00000343925	0.0983607
ENSP00000325120_ENSP00000306245	0.0970874
ENSP00000325120_ENSP00000369050	0.0970874
ENSP00000276198_ENSP00000176183	0.0967742
ENSP00000287820_ENSP00000304895	0.0967742
ENSP00000347474_ENSP00000261707	0.0967742
ENSP00000276198_ENSP00000373169	0.0967742
ENSP00000287820_ENSP00000303830	0.0967742
ENSP00000286355_ENSP00000264381	0.0952381
ENSP00000254235_ENSP00000300900	0.0952381
ENSP00000297323_ENSP00000373298	0.0952381
ENSP00000264832_ENSP00000370163	0.0952381
ENSP00000361099_ENSP00000215832	0.0952381
ENSP00000250080_ENSP00000229794	0.0952381
ENSP00000297323_ENSP00000300900	0.0952381
ENSP00000311405_ENSP00000264381	0.0952381
ENSP00000260600_ENSP00000300900	0.0952381
ENSP00000254235_ENSP00000373298	0.0952381
ENSP00000260600_ENSP00000264381	0.0952381
ENSP00000258400_ENSP00000258400	0.0952381
ENSP00000257763_ENSP00000300900	0.0952381
ENSP00000260600_ENSP00000373298	0.0952381
ENSP00000286355_ENSP00000373298	0.0952381
ENSP00000294016_ENSP00000300900	0.0952381
ENSP00000340684_ENSP00000355930	0.0952381
ENSP00000347754_ENSP00000215754	0.0952381
ENSP00000340684_ENSP00000362549	0.0952381
ENSP00000230882_ENSP00000250080	0.0952381
ENSP00000250080_ENSP00000359478	0.0952381
ENSP00000294016_ENSP00000373298	0.0952381
ENSP00000258400_ENSP00000261707	0.0952381
ENSP00000340684_ENSP00000260433	0.0952381
ENSP00000311405_ENSP00000373298	0.0952381
ENSP00000370163_ENSP00000250080	0.0952381
ENSP00000347754_ENSP00000345282	0.0952381
ENSP00000340684_ENSP00000362505	0.0952381
ENSP00000340684_ENSP00000318585	0.0952381
ENSP00000312126_ENSP00000300900	0.0952381
ENSP00000340684_ENSP00000346768	0.0952381
ENSP00000340684_ENSP00000362534	0.0952381
ENSP00000312126_ENSP00000373298	0.0952381
ENSP00000250080_ENSP00000301645	0.0952381
ENSP00000321334_ENSP00000250080	0.0952381
ENSP00000342560_ENSP00000304811	0.0952381
ENSP00000254235_ENSP00000264381	0.0952381
ENSP00000340684_ENSP00000304845	0.0952381
ENSP00000340684_ENSP00000252809	0.0952381
ENSP00000340684_ENSP00000305221	0.0952381
ENSP00000347754_ENSP00000290291	0.0952381
ENSP00000003084_ENSP00000250080	0.0952381
ENSP00000257763_ENSP00000327652	0.0952381
ENSP00000347754_ENSP00000346821	0.0952381
ENSP00000301141_ENSP00000343925	0.0952381
ENSP00000347754_ENSP00000321988	0.0952381
ENSP00000294016_ENSP00000264381	0.0952381
ENSP00000312126_ENSP00000264381	0.0952381
ENSP00000343925_ENSP00000369050	0.0952381
ENSP00000311405_ENSP00000300900	0.0952381
ENSP00000297323_ENSP00000264381	0.0952381
ENSP00000286355_ENSP00000300900	0.0952381
ENSP00000206249_ENSP00000350766	0.0952381
ENSP00000340684_ENSP00000367309	0.09375
ENSP00000285379_ENSP00000369713	0.09375
ENSP00000273430_ENSP00000252519	0.0930233
ENSP00000305372_ENSP00000300900	0.0925926
ENSP00000361099_ENSP00000359478	0.0925926
ENSP00000361099_ENSP00000206249	0.0916667
ENSP00000356958_ENSP00000229768	0.0909091
ENSP00000356823_ENSP00000219891	0.0909091
ENSP00000229135_ENSP00000327251	0.0909091
ENSP00000223095_ENSP00000303830	0.0909091
ENSP00000216117_ENSP00000361099	0.0909091
ENSP00000216797_ENSP00000325120	0.0909091
ENSP00000361099_ENSP00000267163	0.0909091
ENSP00000361099_ENSP00000370783	0.0909091
ENSP00000364469_ENSP00000325120	0.0909091
ENSP00000229768_ENSP00000263341	0.0909091
ENSP00000356823_ENSP00000300900	0.0909091
ENSP00000361099_ENSP00000233809	0.0909091
ENSP00000367959_ENSP00000261707	0.0909091
ENSP00000361099_ENSP00000325120	0.0900901
ENSP00000252486_ENSP00000325120	0.0897436
ENSP00000356066_ENSP00000206249	0.0895522
ENSP00000337915_ENSP00000359380	0.0892857
ENSP00000337915_ENSP00000344936	0.0892857
ENSP00000337915_ENSP00000343155	0.0892857
ENSP00000337915_ENSP00000215539	0.0892857
ENSP00000337915_ENSP00000294954	0.0892857
ENSP00000337915_ENSP00000318867	0.0892857
ENSP00000337915_ENSP00000355906	0.0892857
ENSP00000337915_ENSP00000324248	0.0892857
ENSP00000337915_ENSP00000322229	0.0892857
ENSP00000337915_ENSP00000324270	0.0892857
ENSP00000337915_ENSP00000280357	0.0892857
ENSP00000337915_ENSP00000356537	0.0892857
ENSP00000337915_ENSP00000264613	0.0892857
ENSP00000337915_ENSP00000323889	0.0892857
ENSP00000337915_ENSP00000343877	0.0892857
ENSP00000337915_ENSP00000308938	0.0892857
ENSP00000337915_ENSP00000330341	0.0892857
ENSP00000337915_ENSP00000306780	0.0892857
ENSP00000337915_ENSP00000299022	0.0892857
ENSP00000337915_ENSP00000226413	0.0892857
ENSP00000337915_ENSP00000265643	0.0892857
ENSP00000337915_ENSP00000053867	0.0892857
ENSP00000337915_ENSP00000373468	0.0892857
ENSP00000337915_ENSP00000227666	0.0892857
ENSP00000265572_ENSP00000338742	0.0888889
ENSP00000265572_ENSP00000279178	0.0888889
ENSP00000046967_ENSP00000300900	0.0888889
ENSP00000346625_ENSP00000265572	0.0888889
ENSP00000343782_ENSP00000300900	0.0888889
ENSP00000206249_ENSP00000306245	0.0882353
ENSP00000234961_ENSP00000336764	0.0882353
ENSP00000260682_ENSP00000360290	0.0882353
ENSP00000260682_ENSP00000229328	0.0882353
ENSP00000260682_ENSP00000341044	0.0882353
ENSP00000260682_ENSP00000366654	0.0882353
ENSP00000260682_ENSP00000275525	0.0882353
ENSP00000250080_ENSP00000228872	0.0882353
ENSP00000302665_ENSP00000250080	0.0882353
ENSP00000250080_ENSP00000215832	0.0882353
ENSP00000260682_ENSP00000309649	0.0882353
ENSP00000260682_ENSP00000344789	0.0882353
ENSP00000260682_ENSP00000229264	0.0882353
ENSP00000272190_ENSP00000285379	0.0880503
ENSP00000258743_ENSP00000325120	0.0877193
ENSP00000222982_ENSP00000219771	0.0869565
ENSP00000219833_ENSP00000238349	0.0869565
[truncated: 2,684 more rows]
