# Supplementary material for: Prediction of Drug Combinations by Integrating Molecular and Pharmacological Data
Source: PLoS Comput Biol. 2011 Dec 29;7(12):e1002323. doi: 10.1371/journal.pcbi.1002323 (PMC3248384; doi:10.1371/journal.pcbi.1002323)
Supplement: Table S5 — 5-fold cross-validation results obtained by different features. (XLSX) [file pcbi.1002323.s008.xlsx]

## Sheet: side effect
threshold	TP	FP	TN	FN	Pre	Rec	F1	FPR
0.5	1.74	24.74	291.6	13.26	0.0788928	0.116	0.0781575	0.270303
1	0.8	6.42	309.92	14.2	0.0888054	0.0533333	0.0579113	0.517004
0.4	2.18	33.6	282.74	12.82	0.0729155	0.145333	0.08022	0.238476
0.8	0.8	6.42	309.92	14.2	0.0888054	0.0533333	0.0579113	0.517004
0.1	11.26	224	92.34	3.74	0.0493887	0.750667	0.0924042	0.70527
0.3	3.46	57.68	258.66	11.54	0.068388	0.230667	0.0963428	0.21446
0.6	1.14	13.14	303.2	13.86	0.100689	0.076	0.0666057	0.395198
0.2	6.94	113.46	202.88	8.06	0.063114	0.462667	0.108836	0.352597
0.9	0.8	6.42	309.92	14.2	0.0888054	0.0533333	0.0579113	0.517004
0.05	14.72	295.7	20.64	0.28	0.0482929	0.981333	0.0919719	0.934335
0.7	0.82	6.9	309.44	14.18	0.0880194	0.0546667	0.0580142	0.51817

## Sheet: ATC
threshold	TP	FP	TN	FN	Pre	Rec	F1	FPR
0.5	3.26	5.86	830.8	20.74	0.375576	0.135833	0.189475	0.00701774
1	0.3	0.54	836.12	23.7	0.0619048	0.0125	0.0205059	0.840561
0.4	3.78	7.44	829.22	20.22	0.347363	0.1575	0.208733	0.00897408
0.8	0.44	0.88	835.78	23.56	0.0703593	0.0183333	0.0281005	0.800972
0.1	11.64	40.34	796.32	12.36	0.237301	0.485	0.311977	0.0479853
0.3	5.52	11.98	824.68	18.48	0.325546	0.23	0.260448	0.0144143
0.6	1.8	3.58	833.08	22.2	0.288286	0.075	0.111045	0.244111
0.2	9.16	23.72	812.94	14.84	0.288713	0.381667	0.323019	0.0283623
0.9	0.3	0.54	836.12	23.7	0.0619048	0.0125	0.0205059	0.840561
0.05	12.14	48.44	788.22	11.86	0.211458	0.505833	0.292402	0.0576802
0.7	1.08	1.68	834.98	22.92	0.220683	0.045	0.0692687	0.482027

## Sheet: disease
threshold	TP	FP	TN	FN	Pre	Rec	F1	FPR
0.5	3.46	6.64	582.38	16.54	0.34374	0.173	0.225459	0.0113546
1	0.24	0.24	588.78	19.76	0.12	0.012	0.0218182	0.760408
0.4	3.52	7.7	581.32	16.48	0.319132	0.176	0.222456	0.0131139
0.8	0.24	0.24	588.78	19.76	0.12	0.012	0.0218182	0.760408
0.1	8.18	72.68	516.34	11.82	0.108107	0.409	0.168426	0.122657
0.3	3.88	12	577.02	16.12	0.268653	0.194	0.217936	0.0202687
0.6	1.4	3.2	585.82	18.6	0.228775	0.07	0.0986707	0.345191
0.2	4.82	23.72	565.3	15.18	0.185571	0.241	0.202114	0.040035
0.9	0.24	0.24	588.78	19.76	0.12	0.012	0.0218182	0.760408
0.05	12.62	152.14	436.88	7.38	0.0790958	0.631	0.139793	0.25737
0.7	0.24	0.24	588.78	19.76	0.12	0.012	0.0218182	0.760408

## Sheet: target
threshold	TP	FP	TN	FN	Pre	Rec	F1	FPR
0.5	5.34	24.54	790.66	18.66	0.197056	0.2225	0.201332	0.0301465
1	2.62	4.9	810.3	21.38	0.341053	0.109167	0.159559	0.0660445
0.4	6.46	33.22	781.98	17.54	0.181562	0.269167	0.208498	0.040909
0.8	3.12	5.68	809.52	20.88	0.370828	0.13	0.1854	0.00709233
0.1	13.02	241.6	573.6	10.98	0.0532208	0.5425	0.0965232	0.295802
0.3	8.28	56.14	759.06	15.72	0.138596	0.345	0.192845	0.0691202
0.6	4.2	12.64	802.56	19.8	0.265258	0.175	0.205123	0.015463
0.2	9.4	106.06	709.14	14.6	0.088639	0.391667	0.142183	0.129786
0.9	2.72	5	810.2	21.28	0.358275	0.113333	0.165893	0.0262113
0.05	16.18	386	429.2	7.82	0.0412376	0.674167	0.0775608	0.472303
0.7	3.4	6.62	808.58	20.6	0.363273	0.141667	0.196089	0.00827266

## Sheet: pathway
threshold	TP	FP	TN	FN	Pre	Rec	F1	FPR
0.5	0	0.16	753.38	23	0	0	0	1
1	0	0	753.54	23	0	0	0	1
0.4	0	0.3	753.24	23	0	0	0	1
0.8	0	0	753.54	23	0	0	0	1
0.1	3.28	55.1	698.44	19.72	0.0623846	0.142609	0.0738071	0.129818
0.3	0	0.64	752.9	23	0	0	0	1
0.6	0	0	753.54	23	0	0	0	1
0.2	0.54	6.9	746.64	22.46	0.0611647	0.0234783	0.0300316	0.605942
0.9	0	0	753.54	23	0	0	0	1
0.05	11.54	241.92	511.62	11.46	0.0485967	0.501739	0.0879376	0.319426
0.7	0	0	753.54	23	0	0	0	1

## Sheet: data integration
threshold	TP	FP	TN	FN	Pre	Rec	F1	FPR
0.5	5.72	30.2	1693.42	28.38	0.17402	0.166558	0.16335	0.0175071
1	0	1.4	1722.22	34.1	0	0	0	1
0.4	6.94	43.46	1680.16	27.16	0.149388	0.202599	0.166374	0.0252129
0.8	2.3	5.7	1717.92	31.8	0.258596	0.0661833	0.101207	0.143151
0.1	16.62	354.04	1369.58	17.48	0.04627	0.486814	0.0842132	0.205198
0.3	9.08	77.58	1646.04	25.02	0.111759	0.265098	0.154731	0.0449081
0.6	4.48	16.36	1707.26	29.62	0.224094	0.130272	0.15797	0.0293861
0.2	11.1	154.88	1568.74	23	0.0713199	0.324476	0.11565	0.0896295
0.9	1.44	3.44	1720.18	32.66	0.223121	0.0412278	0.0674035	0.341672
0.05	22.42	593.74	1129.88	11.68	0.0373379	0.657214	0.0705585	0.344453
0.7	3.36	9.24	1714.38	30.74	0.267235	0.0976329	0.13681	0.0453119
